# Supplementary material for: Data on zooplankton occurrence and abundance in the Far East seas and adjacent Pacific Ocean waters
Source: Copernicus journal article supplement (doi:10.5194/essd-2021-415), 2021-12-03
Supplement: Supplementary file 1 [file essd-2021-415-supplement.pdf]

**Additional information on the collection, processing and storage of raw data, which served as the basis for creating tabular reference books, necessary for dataset correct understanding and use**

In the Pacific Branch of Russian Federal Research Institute of Fisheries and Oceanography (TINRO) all the samples of primary materials of oceanographic and trawl surveys were conducted centrally in a common format according to strictly verified rules in the laboratory of the TINRO regional data centre (Volvenko, 2014a, 2015d), where there is an archive office and a specialized database (DB), where the data can be openly accessed in a prescribed manner in raw or processed form. The situation is more complicated when plankton measurements were taken spontaneously and randomly by individual experts whose data was written in personal notebooks, or after the emergence of personal computers, on spreadsheets (often Microsoft® Office Excel) in an arbitrary format. This data was only accessible and understandable to one person, not comparable with similar data from other scientists, and may have been irrevocably lost in the event of his or her dismissal (or death), or simply due to negligence, improper storage, careless handling, etc. Until finally, during the implementation of the Concept of Information Support (CIS) for fundamental and applied research (Volvenko, 2015a, 2016) after the macrofauna pelagic and bottom trawl DBs (Volvenko, Kulik, 2011; Volvenko et al., 2012, 2014a, b; Volvenko, 2014b, 2015b), the new, large DB “*Net zooplankton in the North Pacific, 1984-2013*” (Volvenko et al., 2016) was created by TINRO in 2012-2014, put into trial operation 2015, and officially registered in the State Register of the Russian Federation in 2016.

Raw data for new DB is taken from plankton processing cards (Fig. S1), filled in (by hand on paper forms and/or in the form of spreadsheets) by TINRO employees during comprehensive ecosystem surveys in the North Pacific and the eastern sector of the Arctic. Of the many hundreds of scientific and commercial surveys only 235 were selected for data processing (Fig. 1); those where samples were taken by the same sampling gear, and processed in strict accordance with the procedures adopted by TINRO in the 1980s (see Materials and Methods), and where all zooplankton groups were fully and thoroughly counted.

| Longitude    |               | Latitude           |          | TINRO    |         |               | Rev. of the counter |    | Collector/Processor |  |
|--------------|---------------|--------------------|----------|----------|---------|---------------|---------------------|----|---------------------|--|
| Sea (region) | Station       | Sample             | Ship     | Date     | Time    | Net<br>BJN    | Layer               |    | m <sup>3</sup>      |  |
| Species      | Length,<br>mm | SF(ind.)           | MF(ind.) | LF(ind.) | Species | Length,<br>mm | SF                  | MF | LF                  |  |
|              |               | Breeding (x times) |          |          |         |               | Breeding (x times)  |    |                     |  |
|              |               |                    |          |          |         |               |                     |    |                     |  |
|              |               |                    |          |          |         |               |                     |    |                     |  |
|              |               |                    |          |          |         |               |                     |    |                     |  |

**Fig. S1.** One of the standard forms for processing plankton samples (from Volkov, 2008a). There the zooplankton size fractions are designated by the abbreviations: SF – small (fine), MF – mean and LF – large (coarse) fraction

Along with other data the DB includes more than 1,100 samples collated from non-Russian ships. The fishing vessel “Sea Storm”, the research ships “Oscar Dyson” (USA) and “Kaiyo Maru” (Japan) carried out simultaneous trawl and plankton surveys mostly in the central and eastern parts of the Bering Sea<sup>1</sup> under the international program BASIS (Bering-Aleutian Salmon International Survey), organized by the NPAFC (North Pacific Anadromous Fish Commission) member countries in 2002-2012. In the Sea of Japan 95 measurements in 1999-2007 were taken on board the Japanese fishing schooner Chokai Maru. All these ships had TINRO planktonologists who collected samples with the same gear and processed them following TINRO protocols. Plankton samples in the exclusive economic zone (EEZ) of North Korea (see Fig. 1) were taken from Russian ships, which were carrying out standard

<sup>1</sup> These expeditions recorded the impact of prolonged climatic fluctuations on plankton and, as a consequence, on the nutrition of fish living there, including the Pacific salmon (e.g.: Volkov et al., 2009; Volkov, 2012, 2014), which these expeditions were organized to study.

comprehensive studies of the biological resources under an intergovernmental agreement. Therefore, all the data in the DB, regardless of the place and time of its collation, are fully comparable.

In fact, the DB preparations began with the preliminary digitization of the primary data by TINRO planktonologists in Excel spreadsheets. Upon its completion, Dr. A.F. Volkov kindly gave me the file (168 MB) with four tables measuring 244 columns by 41,809 rows, which contained information about the measurements taken in the Chukchi and Bering seas, the Sea of Okhotsk and the North Pacific Ocean, with data on abundance (specimens/m<sup>3</sup>) and biomass (mg/m<sup>3</sup>) of plankton caught by the Juday net, calculated with corrections made for catch efficiency and information about the values of these corrections. Similar tables (14 MB) from the Sea of Japan but without data on plankton biomass were drawn up by Ph.D. N.T. Dolganova. Such planktonology tables were satisfactory for many years<sup>2</sup>. The significant disadvantages of this approach to data storage and processing were discovered only recently as the data accumulated.

By 2014, in accordance with the plans for the implementation of the CIS, I combined and transformed these tables into a relational DB using Microsoft® Office Access. Some of the obvious benefits of this form of storage are given in Table S1.

**Table S1.** Comparison of the two forms of storage of plankton cards – before and after the creation of the database

| Initial spreadsheet                                                                                                  | Final relational database                                                                                |
|----------------------------------------------------------------------------------------------------------------------|----------------------------------------------------------------------------------------------------------|
| A huge number of columns (variables) in which most of the values are zero for species that were not found*           | No extra variables or zeros**                                                                            |
| For each measurement the ‘header’ of the card is duplicated seven times                                              | No repeats – all records are unique                                                                      |
| Lots of text values                                                                                                  | The text is replaced by numerical codes (less space and faster processing)                               |
| Contains data and calculation results                                                                                | Only raw data is stored                                                                                  |
| Typos ‘.’ instead of ‘,’ or suchlike give errors                                                                     | It is impossible to make a mistake in the data format or make a typo in Latin (scientific) species names |
| There are restrictions on the number of rows and columns                                                             | The amount of stored data is not limited                                                                 |
| Only the simplest options are available for sorting and retrieval of data at low speed with a large size of the file | The file is much smaller, there are more options and the speed of data processing is much faster         |

Notes: \* - In the Initial spreadsheet, each station had a list of all species that were ever caught. Those that were present at this station were opposed by the values of their abundance and biomass in the sample, against the rest we had zeros. \*\* - The database does not need to store zero values of abundance and biomass of all absent species for each station. Moreover, each station associate with a list of only those species that were present at it. When processing a request to the database at those stations where some species is absent, its abundance and biomass are automatically assigned zero values.

In the development of this DB structure (Fig. S2) industry standards, standard forms, and codifiers (Fisheries, 1976; Codifier, 1980; Instructions, 1982) were utilized, as well as previous experience in creating the DBs of trawl macrofauna (Volvenko et al., 2012, 2014a, b). While working on the raw data thousands of typos and omissions were found. In particular, coordinates, names of bodies of water and region numbers, sampling dates and times, time of day, light or dark, ship names and survey numbers, synonyms and obsolete names of species, classification of size groups in the wrong fractions, absent and/or incorrect abundance values  $N$  and biomass  $M$  were corrected; duplicate records were removed, data format errors were eliminated.

In addition, records for the Chukchi and Bering seas, the Sea of Okhotsk, the Sea of Japan and the Pacific Ocean were found and outliers for the average individual weight of specimens  $W = M/N$  (mg/specimen) were corrected. The errors were due to the incorrect number values  $N$  (specimens/m<sup>3</sup>) or biomass  $M$  (mg/m<sup>3</sup>) species in the catch: where the values  $W$  were different from the well-known values for this species of the long-term annual average modulus<sup>3</sup> by more than 20%, the abundance indices

<sup>2</sup> In some publications (e.g.: Dulepova, 2014; Volkov, 2015), they were called “Plankton databases”, before data on them was imported into the real DB.

<sup>3</sup> They are taken from standard wet weight tables (Borisov et al., 2004) as amended and supplemented by Dr. Volkov.

were recalculated using the formulas  $N = M/W$  and  $M = N \cdot W$  based on the long-term annual average  $W$ . The fact that (according to information received from data collators) until 1988 inclusive, the processing of samples accurately assess biomass, and since 1989, number. Accordingly, in the first case,  $N$  of organisms was calculated by  $M$ , and in the second,  $M$  by  $N$ .

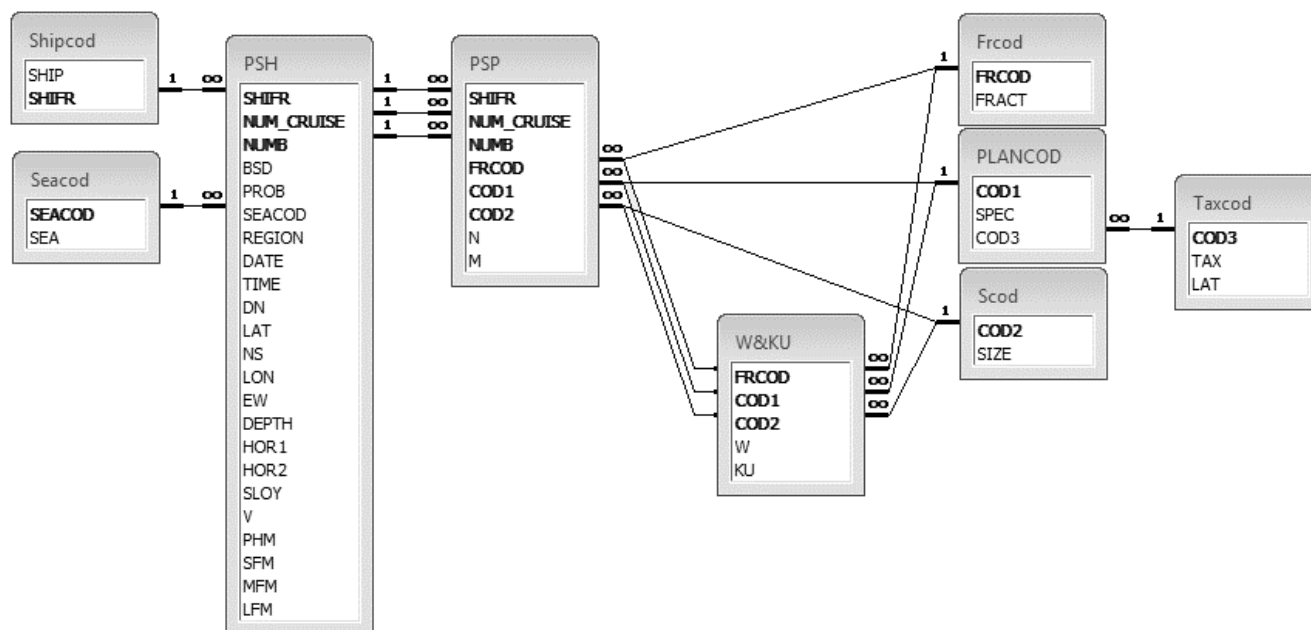

**Fig. S2.** Structure of the database. The PSH table contains the ‘headers’ of plankton cards (see Fig. 2): vessel call-sign (SHIFR), voyage number (NUM\_CRUISE), sequential sample number from the beginning of the voyage (NUMB), station number recorded in the card (BSD), number of sample at the given station (PROB), sea and ocean code (SEACOD), region number (REGION), date (DATE) and time (TIME) of sampling, light or dark time of day (DN), latitude (LAT), northern or southern hemisphere (NS), longitude (LON), eastern or western hemisphere (EW), depth of area (DEPTH), initial (HOR1) and final (HOR2) catch depth, catch layer (SLOY), caught water volume (V), total biomass of phytoplankton (PHM), small (SFM), medium (MFM) and large (LFM) zooplankton fractions. The PSP table contains data from the card rows: in addition to the first three mentioned above it includes the fraction (FRCOD), species (COD1), size group or developmental stage (COD2) codes, data on abundance (N) and biomass (M). The W&KU table contains data on the average weight of specimens (W) and the catch efficiency coefficients (KU). All the other tables – codifiers: Shipcod – ships, Seacod – reservoirs, Frcod – fractions, PLANCOD – species, Taxcod – supraspecific taxonomic units, Scod – size groups and developmental stages of specimens. Key fields are highlighted in bold. All the links between the tables are “one-to-many”

As already mentioned above, initially there was a lack of data on biomass in the Sea of Japan. Using the available data on  $N$  and the long-term annual average  $W$ , taken from standard tables on wet weight (Borisov et al., 2004; Mikulich, Rodionov, 1975), amended and supplemented by Dr. Dolganova,  $M$  plankton was calculated for each sample according to the formula  $M = N \cdot W$ .

Then the occurrence of every species of each of the fractions in the surveyed waters was mapped. From this process any species found extremely far beyond their well-known geographical range were corrected, and given the names of species which look similar to the former, but are common in the survey area.

Thereafter, data on the relative abundance of marine organisms classified per cubic meter was reconverted to primary measurements while factoring in catch efficiency. Now the DB does not contain the results of calculations, but the raw data for them: the data of actual measurements and the list of adopted corrections regarding catch efficiency for each species. As a result, unrequired fields were deleted from the DB, and its size decreased to 52.6 MB. The initial tables, in the form in which they were prepared by Volkov and Dolganova, only now without mistakes, are instantly accessible via simple DB queries. It is now possible to recalculate  $N$  and  $M$ , if necessary, with the adoption of other catch efficiency coefficients.

So in this way the work on the creation of this DB was almost completed in 2014, but it was only officially registered in the State Register of the Russian Federation at the beginning of 2016. In accordance with the regulations stipulated in the CIS (Volvenko, 2015a-c, 2016) almost all of 2015 was spent on a final verification of the information contained in the DB, via its derivative knowledge bases,

including not raw data but results of their mathematical processing. In tandem with this verification reference tables on plankton in the Far Eastern seas and the northwestern part of the Pacific Ocean were drawn up.

For  $N$  and  $M$  of each taxonomic group of animals at each stage of development or size group in each fraction per the cubic meter (respectively in specimens/m<sup>3</sup>, and mg/m<sup>3</sup>), for each plankton sample (see Fig. 1) were recalculated as:

$$N = \frac{n \cdot p}{v} = \frac{n \cdot p}{0,1 \cdot (h_1 - h_2)} \quad \text{and} \quad M = \frac{m \cdot p}{v} = \frac{m \cdot p}{0,1 \cdot (h_1 - h_2)},$$

where:  $n$  – number (specimen) and  $m$  – weight (mg) of this species/stage/group/fraction in the catch;  $v$  – volume, filtered by the net (m<sup>3</sup>);  $h_1$  – initial,  $h_2$  – final catch depth (m) determined taking into account the angle of inclination of the cable (e.g. Volkov, 2008a).  $h_1-h_2$  – net distance covered (m);  $p$  – dimensionless correction of catch efficiency; constant 0.1 – the net mouth area (m<sup>2</sup>).

This formula differs from the standard ones by the correction  $p$ , compensating for the underestimation of  $N$  and  $M$ , due to the imperfection of the sampling gear. This correction (the need for which is recognized by many, e.g.: Clutter, Anraku, 1968; Kiselev, 1969; Grese et al., 1975; Musaeva, Nezlin, 1996; Gorbatenko, Dolganova, 2006, 2007; Volkov, 2008a), is the inverse of the catch efficiency coefficient. According to the classic definition, the catch efficiency coefficient is the ratio of the number of animals caught to the entire number of animals that were in the catch area (Baranov, 1933). It introduces a multiplier in the denominator of the formulas to calculate the density of marine macrofauna (see, for example: Shuntov, Bocharov 2003a, b, 2004a, b, 2005a, b, 2006a, b, 2012a-c, 2014a-e) and can vary from 0 to 1. The reciprocal value (the catch efficiency correction) usually used by TINRO planktonologists ( $p \geq 1$ ) introduces a factor in the numerator. The value of  $p$  depend on the taxonomic affiliation, fraction, developmental stage, size of animals and vary from 1 to 10 (see Dolganova, Volvenko, 2016a, b; Volkov, Volvenko, 2016a-c). Comparisons of the catchability of the large Juday net with other plankton nets have been published earlier (Kiselev, 1969; Timonin, 1983; Musaeva, Nezlin, 1996; Gorbatenko, Dolganova, 2006, 2007).

Subsequently, based on the relative values of  $M$  we may calculate the absolute abundance of thousands of tons of each species, the individual stages of their development, size classes, supraspecific taxonomic and ecological groups, fractions, the total zooplankton for various water layers and the time periods in the standard areas of biostatistical data averaging (Fig. 1). All this was submitted to planktonologists for verification. When errors were detected the raw data was edited, and the entire procedure above was repeated. This cycle continued until all errors were eliminated and the DB acquired its final form.

The resulting DB is a consolidated, structured, carefully verified and edited compact data array<sup>4</sup> that is optimized for its comprehensive high-speed processing. It contains information on 25,512 plankton samples (Fig. 1, Table S2) performed from 27 April 1984 to 12 September 2013 in 235 surveys, with data on 214 taxonomic groups (Table S3).

In preparation for the tabular reference books (Fig. S3) discussed in the article, some irremovable shortcomings of data were found:

Firstly, it is the incomplete coverage of the surveyed area. The overwhelming majority of plankton collections were conducted in the Russian EEZ (see Fig. 1). Of the four Far Eastern seas only Okhotsk was almost entirely located within it, so the measurements, and thus the data produced in our surveys only this particular area is covered almost entirely, and even then with the exception of coastal waters. Nearly all the planktonic work was carried out before or immediately after macrofauna trawls, and because of this, the vast majority of measurements were taken at depths of at least 25-30 m (corresponding to the minimum vertical opening of the majority of midwater trawls). In addition to this, conducting surveys near the coast and far out at sea in large research vessels has always been impeded by the red tape associated with the repeated crossing of maritime borders, and smaller vessels do not work at a considerable distance from their ports. As a consequence, plankton belonging to the coastal

<sup>4</sup> The minimum database configuration is a Microsoft Access 52.6 MB file which contains 9 tables (see Fig. S4) and 35 queries. As new data is added and ways to process it (forms, queries, reports, macros, program modules, auxiliary tables), its size can increase indefinitely.

(neritic) biotope is covered only by its seaward periphery. Only in the Sea of Japan is much of the data collected using small tonnage seiners and boats, which are capable of working off the coast in shallow waters. Therefore, the plankton neritic zone in the Sea of Japan (especially in the Peter the Great Bay, and in the Northern Primorye) is studied more fully than in the Okhotsk, Bering and, especially, Chukchi seas.

**Table S2.** The inter-annual fluctuations of survey intensity (number of plankton samples)

| Year  | Chukchi Sea | Bering Sea | Sea of Okhotsk | Sea of Japan | Ocean waters | Total |
|-------|-------------|------------|----------------|--------------|--------------|-------|
| 1984  | 0           | 0          | 150            | 0            | 0            | 150   |
| 1985  | 0           | 0          | 152            | 75           | 1            | 228   |
| 1986  | 0           | 134        | 175            | 22           | 2            | 333   |
| 1987  | 1           | 214        | 0              | 0            | 117          | 332   |
| 1988  | 0           | 245        | 185            | 131          | 0            | 561   |
| 1989  | 1           | 175        | 0              | 223          | 1            | 400   |
| 1990  | 0           | 296        | 122            | 126          | 13           | 557   |
| 1991  | 0           | 78         | 191            | 163          | 152          | 584   |
| 1992  | 0           | 68         | 297            | 76           | 8            | 449   |
| 1993  | 0           | 155        | 379            | 68           | 306          | 908   |
| 1994  | 0           | 0          | 384            | 106          | 76           | 566   |
| 1995  | 0           | 106        | 388            | 138          | 205          | 837   |
| 1996  | 0           | 0          | 344            | 143          | 45           | 532   |
| 1997  | 0           | 0          | 281            | 39           | 0            | 320   |
| 1998  | 0           | 79         | 544            | 51           | 14           | 688   |
| 1999  | 0           | 281        | 428            | 26           | 9            | 744   |
| 2000  | 0           | 243        | 458            | 61           | 13           | 775   |
| 2001  | 0           | 186        | 451            | 57           | 13           | 707   |
| 2002  | 0           | 140        | 544            | 31           | 70           | 785   |
| 2003  | 18          | 332        | 157            | 195          | 94           | 796   |
| 2004  | 0           | 210        | 419            | 189          | 217          | 1035  |
| 2005  | 0           | 373        | 462            | 299          | 56           | 1190  |
| 2006  | 0           | 240        | 90             | 202          | 253          | 785   |
| 2007  | 23          | 389        | 585            | 521          | 97           | 1615  |
| 2008  | 25          | 336        | 481            | 427          | 149          | 1418  |
| 2009  | 0           | 481        | 643            | 528          | 506          | 2158  |
| 2010  | 37          | 546        | 424            | 363          | 467          | 1837  |
| 2011  | 0           | 357        | 657            | 306          | 239          | 1559  |
| 2012  | 0           | 376        | 656            | 359          | 107          | 1498  |
| 2013  | 0           | 409        | 441            | 206          | 109          | 1165  |
| Total | 105         | 6449       | 10488          | 5131         | 3339         | 25512 |

The second drawback is the very uneven distribution of measurements in space and time (see Fig. 1, Table S2). The more or less regular study of plankton in the Sea of Okhotsk began in 1984, in the Sea of Japan in 1985, in the Bering Sea in 1986, and in the Pacific in 1987. Since then, the intensity of plankton research as a whole increased, reaching its peak in 2009, after which it sharply declined, mainly due to the reduced number of surveys in the Sea of Japan and in the ocean. When preparing the above tabular reference books, it was found that ocean area 11 (see Fig. 1) was left practically unstudied, and there were very few samples in the southern half of area 12. In addition, it was found that in areas 1-4 sufficient samples were rarely taken for statistical processing, in autumn only areas 5-7, and in spring only the epipelagic in areas 9, 12 and 13 were fully studied. Another example: in the most studied part of the Sea of Japan, the Peter the Great Bay, very few samples were taken in winter or in the dark, regardless of the season, or in 1991-1995. For this reason, the composition and abundance of plankton in “sardine and pollock fish abundance” – 1988-1990 completely drop out of consideration. Therefore,

for the 49% of the tabular reference books, out of those that was planned for the Bay in accordance with the principles of regionalization and the four data categories (see above), insufficient data was collated. In the Sea of Okhotsk there was insufficient for 24%, in the Bering Sea for 40%, in the Sea of Japan for almost 50%, and in the North-West Pacific Ocean for 60% of the tables (see Dolganova, Volvenko, 2016a, b; Volkov, Volvenko, 2016a-c). So even for waters that were continuously monitored there is no data for many regions on all seasons for long time periods. (For the rest of the waters, there are even less. For example, in the Chukchi Sea only two plankton samples were taken, probably by accident, over 18 years (from 1984 to 2002), and in 2004-2006, 2009, and 2011-2013 none were taken. Therefore, information about the regions, shaded in Fig. 1, was not included in the reference books).

**Table S3.** Composition of mesofauna found in the surveyed water area (Fig. 1) whose details are in the database

| Taxonomic/environmental group                           | Species number in database | Including water bodies |            |                |              |               |
|---------------------------------------------------------|----------------------------|------------------------|------------|----------------|--------------|---------------|
|                                                         |                            | Chukchi Sea            | Bering Sea | Sea of Okhotsk | Sea of Japan | Pacific Ocean |
| Copepods                                                | 94                         | 25                     | 47         | 43             | 61           | 75            |
| Gelatinous (jellyfish, comb jellies, pelagic tunicates) | 29                         | 4                      | 8          | 8              | 17           | 16            |
| Amphipods                                               | 22                         | 4                      | 9          | 7              | 8            | 18            |
| Euphausiids                                             | 18                         | 5                      | 9          | 7              | 7            | 17            |
| Mysida                                                  | 11                         | 1                      | 1          | 1              | 11           | 1             |
| Chaetognaths                                            | 8                          | 1                      | 2          | 2              | 1            | 8             |
| Cladocera                                               | 8                          | 3                      | 3          | 3              | 6            | 3             |
| Pteropods                                               | 6                          | 2                      | 2          | 2              | 3            | 5             |
| Protozoa                                                | 4                          | 0                      | 2          | 2              | 4            | 2             |
| Planktonic polychaetes                                  | 1                          | 1                      | 1          | 1              | 0            | 1             |
| Cumaceans*                                              | 1                          | 1                      | 1          | 1              | 1            | 1             |
| Ostracods*                                              | 1                          | 1                      | 1          | 1              | 1            | 1             |
| Isopods*                                                | 1                          | 0                      | 0          | 0              | 1            | 0             |
| Meroplankton (larvae of animals)**                      | 10                         | 7                      | 9          | 7              | 9            | 9             |
| In total no less than                                   | 214                        | 55                     | 95         | 85             | 130          | 157           |

Notes: \* marks 3 groups which are not identified by species, \*\* for larvae these are broad groups (e.g. Polychaeta, Gastropoda, Bivalvia, Mysida, Decapoda, Echinodermata) instead of species.

This of course makes it difficult to study the seasonal and long-term dynamics of ecosystems. The regular study at least of the EEZ of the Russian Federation with standard, uniform net measurements is not possible for a few reasons. One of them is relatively<sup>5</sup> objective, and that is the ice conditions in the cold season. The rest relate solely to the lack of funding which forced compromises in quality and quantity of data.

The third drawback is the side effect or the “flip side” of the express method of processing plankton samples, through which a huge amount of data has been collated in the DB. At sea, primary processing occurs daily around the clock immediately before the next sample batch is caught, and when the vessel returns to the port a scientific report is submitted to the TINRO archives office with detailed analyses of all the data collated during the survey. Only common representatives of plankton are identified by species, with others identified only by genus or family, cumaceans and isopods only by group, ostracods by class, and rotifers, for example, are not counted. Due to minor morphological differences between the individual surveys, copepods were not distinguished which in the DB are listed as *Calanus glacialis* + *marshallae* and *Neocalanus plumchrus* + *flemingeri*<sup>6</sup>. As a result, according to the tables published by M.S. Kun (1975), who counted 288 species<sup>7</sup> of plankton in the Far Eastern seas

<sup>5</sup> “Relatively” because, if necessary, plankton samples can be taken from under the ice even in the Arctic and Antarctic using icebreakers, from the ice surface in natural or artificial ice clearings. This is, however, not as beneficial for TINRO as it is expensive.

<sup>6</sup> There is reason to believe that there are really 2 rather than 4 species (Volkov, 2016), but this hypothesis needs further verification.

<sup>7</sup> This is without two squid species, which we, in contrast to M.S. Kun, refer to not as plankton but as nekton, and not as meso- but as macrofauna.

and the north-western part of the Pacific Ocean, more than 1/4 of them are not included in the DB (see table 2). The underestimation by seas<sup>8</sup> is as follows: the Bering Sea – 9%, the Okhotsk Sea – 30%, the Sea of Japan – 38% of the species. The biggest positive in this respect is the situation in the Bering Sea, but if we take more recent information, there are not 104 (according to Kun, 1975), but 177 (according to Kulikov, 1993) zooplankton species. So the shortfall in this sea is not 9% but 46%. So without too much optimism we can assume that for each body of water we have counted, at best, only 50-70% of the species; only the most common of them. The lack of speciation of very similar species, is found in most plankton datasets due to the amount of time and expertise required to fully sample zooplankton and analyse samples. However, it is known (Volkov, 1996b) that in all the surveyed waters the first 2-3 dominant species of plankton account for more than 50%, and the top 10 no less than 85-90% of the total biomass of zooplankton. With such a low species evenness, the 50 and especially 150 most common species give much more than 99% of this value. Therefore, the shortcomings of the DBs discussed here may be important for taxonomists and fauna scientists studying rare or very scant species, but in most other studies are not of importance.

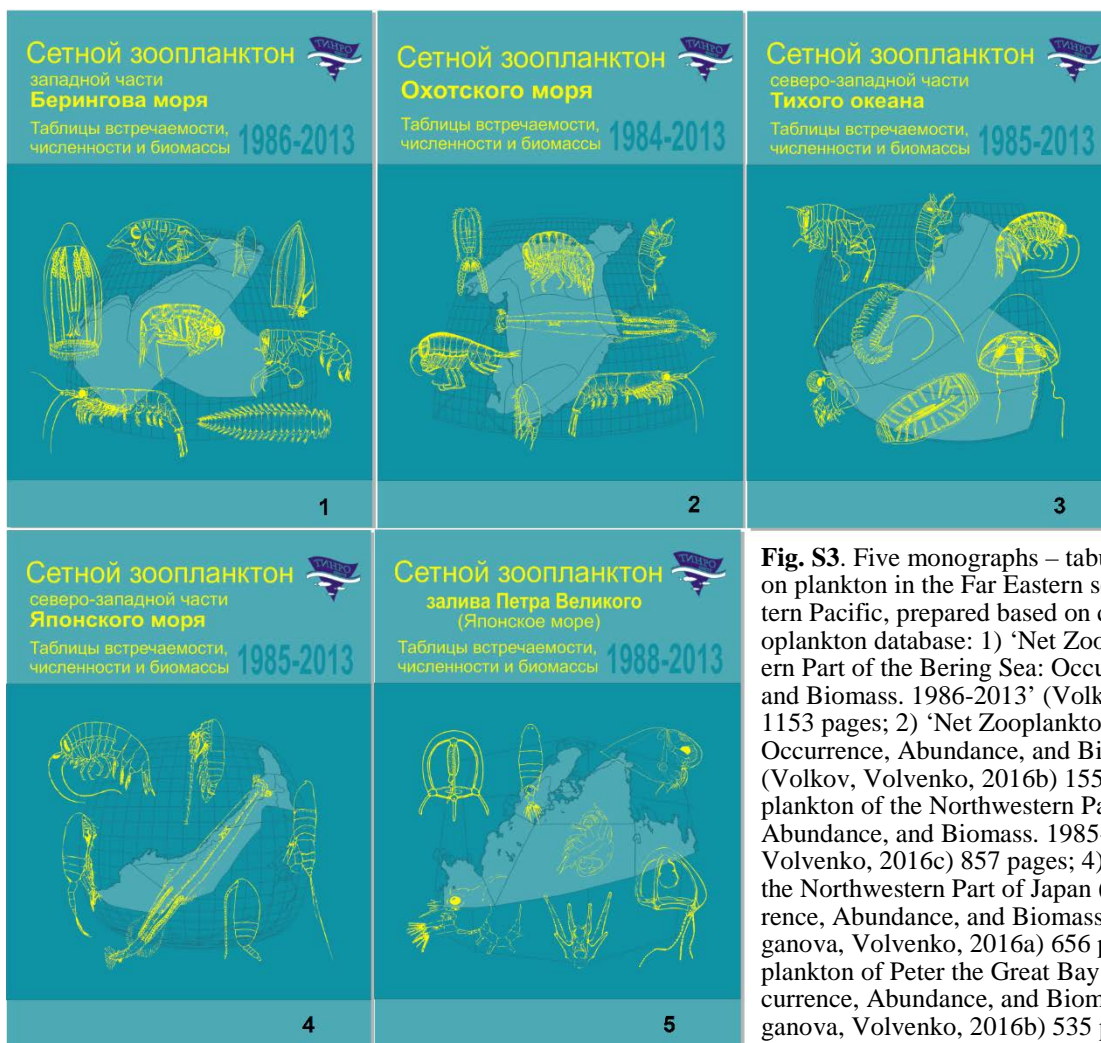

**Fig. S3.** Five monographs – tabular reference books on plankton in the Far Eastern seas and the north-western Pacific, prepared based on data in the new net zooplankton database: 1) ‘Net Zooplankton of the Western Part of the Bering Sea: Occurrence, Abundance, and Biomass. 1986-2013’ (Volkov, Volvenko, 2016a) 1153 pages; 2) ‘Net Zooplankton of the Okhotsk Sea: Occurrence, Abundance, and Biomass. 1984-2013’ (Volkov, Volvenko, 2016b) 1555 pages; 3) ‘Net Zooplankton of the Northwestern Pacific: Occurrence, Abundance, and Biomass. 1985-2013’ (Volkov, Volvenko, 2016c) 857 pages; 4) ‘Net Zooplankton of the Northwestern Part of Japan (East) Sea: Occurrence, Abundance, and Biomass. 1985-2013’ (Dolganova, Volvenko, 2016a) 656 pages; 5) ‘Net Zooplankton of Peter the Great Bay (Japan/East Sea): Occurrence, Abundance, and Biomass. 1988-2013’ (Dolganova, Volvenko, 2016b) 535 pages

After the publication of the tabular reference books (Fig. S3), my colleagues drew my attention to the fact that data collectors used outdated species identification guides, so there were many outdated species names in the tables. When preparing for the publication of the dataset, I corrected these shortcomings, using information from the WoRMS website for this (Table S4). All of these edits have been reviewed and approved by Volkov and Dolganova.

<sup>8</sup> For the ocean M.S. Kun (1975) gives species richness only for the Kuril-Kamchatka region and she provides no data at all on the Chukchi Sea.

**Table S4.** Replacement of species names in the new data array

| Old or wrong scientific name of the species used in the reference books | The new accepted name of the species according to information from WoRMS | Where changes were needed |
|-------------------------------------------------------------------------|--------------------------------------------------------------------------|---------------------------|
| <i>Corymorpha aurata</i>                                                | <i>Euphysa aurata</i>                                                    | Jap, PGB                  |
| <i>Corymorpha flammea</i>                                               | <i>Euphysa flammea</i>                                                   | Jap, PGB                  |
| <i>Tubularia chistinae</i>                                              | <i>Hybocodon prolifer</i>                                                | Jap, PGB                  |
| <i>Tubularia prolifer</i>                                               | <i>Hybocodon prolifer</i>                                                | Jap, PGB                  |
| Siphonophora gen. sp.                                                   | Siphonophorae gen. sp.                                                   | Jap, PGB                  |
| <i>Hydractinia carnea</i>                                               | <i>Podocoryna carnea</i>                                                 | Jap, PGB                  |
| <i>Evadne tergestina</i>                                                | <i>Pseudevadne tergestina</i>                                            | Jap, PGB                  |
| <i>Podon leuckartii</i>                                                 | <i>Podon leuckartii</i>                                                  | Ber, Okh, Jap, PGB, Pac   |
| <i>Acartia clausi</i>                                                   | <i>Acartia (Acartiura) clausi</i>                                        | Ber, Okh, Jap, PGB, Pac   |
| <i>Acartia longiremis</i>                                               | <i>Acartia (Acartiura) longiremis</i>                                    | Ber, Okh, Jap, PGB, Pac   |
| <i>Acartia pacifica</i>                                                 | <i>Acartia (Odontacartia) pacifica</i>                                   | Jap, PGB, Pac             |
| <i>Acartia stelleri</i>                                                 | <i>Acartia (Acanthacartia) steueri</i>                                   | Jap, PGB                  |
| <i>Acartia tumida</i>                                                   | <i>Acartia (Acanthacartia) tumida</i>                                    | Ber, Okh, Jap, PGB, Pac   |
| <i>Aetideus pacificus</i>                                               | <i>Pseudochirella pacifica</i>                                           | Ber, Okh, Jap, Pac        |
| <i>Derjuginia tolli</i>                                                 | <i>Jaschnovia tolli</i>                                                  | Jap                       |
| <i>Epilabidocera amphitrites</i>                                        | <i>Epilabidocera longipedata</i>                                         | Ber, Okh, Jap, PGB, Pac   |
| <i>Eucalanus elongatus</i>                                              | <i>Eucalanus elongatus elongatus</i>                                     | Pac                       |
| <i>Eucalanus pseudoattenuatus</i>                                       | <i>Pareucalanus attenuatus</i>                                           | Pac                       |
| <i>Eucalanus subcrassus</i>                                             | <i>Subeucalanus subcrassus</i>                                           | Pac                       |
| <i>Eucalanus subtenius</i>                                              | <i>Subeucalanus subtenius</i>                                            | Jap, Pac                  |
| <i>Euchirella brevis</i>                                                | <i>Euchirella amoena</i>                                                 | Ber, Pac                  |
| <i>Gaidius</i> sp.                                                      | <i>Gaetanus</i> sp.                                                      | Ber, Okh, Pac             |
| <i>Gaidius variabilis</i>                                               | <i>Gaetanus minutus</i>                                                  | Ber, Okh, Jap, PGB, Pac   |
| <i>Labidocera bipinnata</i>                                             | <i>Labidocera rotunda</i>                                                | Jap, PGB                  |
| <i>Megacalanus longicornis</i>                                          | <i>Megacalanus princeps</i>                                              | Pac                       |
| <i>Paracalanus parvus</i>                                               | <i>Paracalanus parvus parvus</i>                                         | Okh, Jap, PGB, Pac        |
| <i>Pareuchaeta</i> sp.                                                  | <i>Paraeuchaeta</i> sp.                                                  | Ber, Okh, Pac             |
| <i>Pareuchaeta japonica</i>                                             | <i>Paraeuchaeta elongata</i>                                             | Ber, Okh, Jap, PGB, Pac   |
| <i>Pleuromamma abdominalis</i>                                          | <i>Pleuromamma abdominalis abdominalis</i>                               | Pac                       |
| <i>Pleuromamma xiphias</i>                                              | <i>Pleuromamma xiphias</i>                                               | Pac                       |
| <i>Pseudochirella polyspina</i>                                         | <i>Pseudochirella obtusa</i>                                             | Pac                       |
| <i>Scolecithricella ovata</i>                                           | <i>Pseudoamallothrix ovata</i>                                           | Ber, Okh, Pac             |
| <i>Sinocalanus tenellus</i>                                             | <i>Sinocalanus tenellus</i>                                              | Jap, PGB                  |
| <i>Tortanus discaudatus</i>                                             | <i>Tortanus (Boreotortanus) discaudatus</i>                              | Ber, Okh, Jap, PGB, Pac   |
| <i>Undinula darwini</i>                                                 | <i>Cosmocalanus darwini darwini</i>                                      | Pac                       |
| <i>Oithona brevicornis</i>                                              | <i>Oithona brevicornis brevicornis</i>                                   | Jap, PGB                  |
| <i>Oncaea borealis</i>                                                  | <i>Triconia borealis</i>                                                 | Ber, Okh, Jap, PGB, Pac   |
| <i>Oncaea conifera</i>                                                  | <i>Triconia conifera</i>                                                 | Jap, PGB                  |
| <i>Acanthomysis borealis</i>                                            | <i>Exacanthomysis borealis</i>                                           | Jap, PGB                  |
| <i>Acanthomysis dimorphastelleri</i>                                    | <i>Hemiacanthomysis dimorpha</i>                                         | Jap, PGB                  |
| <i>Disacanthomysis dybovskii</i>                                        | <i>Disacanthomysis dybovskii</i>                                         | Jap, PGB                  |
| <i>Meterythroptis microphthalmus</i>                                    | <i>Meterythroptis microphthalmus</i>                                     | Jap, PGB                  |
| <i>Neomysis cherniavskii</i>                                            | <i>Neomysis czerniavskii</i>                                             | Jap, PGB                  |
| <i>Neomysis japonicus</i>                                               | <i>Neomysis japonica</i>                                                 | Jap, PGB                  |
| <i>Paracanthomysis schikotensis</i>                                     | <i>Paracanthomysis shikhotaniensis</i>                                   | Jap, PGB                  |
| <i>Tessarabrachion oculatus</i>                                         | <i>Tessarabrachion oculatum</i>                                          | Ber, Pac                  |
| Thecosomata (Pteropoda) gen. sp.                                        | Tectipleura (Pteropoda) gen. sp.                                         | Jap, PGB                  |
| <i>Cavolinia pyramidata</i>                                             | <i>Clio pyramidata</i>                                                   | Pac                       |
| <i>Euclio</i> sp.                                                       | <i>Clio</i> sp.                                                          | Pac                       |
| <i>Ferrosagitta ferox</i>                                               | <i>Ferrosagitta ferox</i>                                                | Pac                       |
| <i>Ferrosagitta bipunctata</i>                                          | <i>Sagitta bipunctata</i>                                                | Pac                       |
| <i>Sagitta elegans</i>                                                  | <i>Parasagitta elegans</i>                                               | Ber, Okh, Jap, PGB, Pac   |
| <i>Flaccisagitta maxima</i>                                             | <i>Pseudosagitta maxima</i>                                              | Okh, Pac                  |
| <i>Sagitta nagae</i>                                                    | <i>Zonosagitta nagae</i>                                                 | Pac                       |
| <i>Oikopleura vanhoeffeni</i>                                           | <i>Oikopleura (Vexillaria) vanhoeffeni</i>                               | Ber, Okh, Jap, PGB, Pac   |
| <i>Doliolum</i> sp.                                                     | <i>Doliolum</i> sp.                                                      | Okh, Pac                  |
| Mysidacea gen. sp.                                                      | Mysida gen.sp.                                                           | Ber, Okh, Jap, PGB, Pac   |

Note: WoRMS – World Register of Marine Species <http://www.marinespecies.org>, Ber – Bering Sea, Jap – The Sea of Japan, Okh – The Sea of Okhotsk, Pac – Pacific Ocean, PGB – Peter the Great Bay.



At the end of this Supplement, let me give a few examples of my first experience in operating zooplankton DB to investigate the geographical patterns of marine life distribution.

Using this DB, the mean annual concentration and total biomass of zooplankton in the epipelagic layer for the Bering, Okhotsk, Japan seas, and the northwestern Pacific Ocean were estimated (Shuntov, Volvenko, 2017). Significant differences are shown for spatial distribution and temporal dynamics of the small-, medium- and large-sized zooplankton abundance and its daily vertical migrations in different areas. Zooplankton stocks in all these regions are evaluated as high; their bulks are formed by large-sized fraction. Interannual fluctuations of the zooplankton abundance could be considerable in certain areas, but its total resource within the Far Eastern basin does not change much: the abundance decline in some areas is compensated by its growth in other ones. A comparison was also made (Volvenko, 2017) of all these large marine areas for various plankton characteristics.

In the next publication (Volvenko, 2019) were compiled and analysed maps of the spatio-temporal distribution of plankton; a hypothesis was made regarding the negative correlation of the plankton size with temperature; and revealed that some fluctuations in the abundance of zooplankton in the Bering Sea and the ocean occur synchronously and unidirectionally, whereas in the Sea of Japan and the Sea of Okhotsk the fluctuations are opposite (out of phase): during the transition from the day to the night in the Okhotsk and Japan seas, the density of plankton throughout the epipelagic zone increases; in the same time in the Bering Sea and the ocean, over large parts of the area, it decreases<sup>9</sup>.

Later (Volvenko, 2020) the spatial distribution patterns of 6 integral characteristics of zooplankton are studied at different levels of the spatial scale using GIS and statistical analysis – abundance  $N$ , biomass  $M$ , diversity  $H'$ , species richness  $S$ , evenness  $J$ , and the mean individual body weight of animals  $W$ . It is shown that these characteristics are subject to circum-continental zonation, which manifested as an increase in  $W$  and a decrease in  $N$ ,  $M$  and  $J$  corresponding with the distance from land to the open sea. In the same direction, the variability of all the integral characteristics decrease. Classical manifestations of the latitudinal zonation of zooplankton are observed to an even higher degree: Humboldt-Wallace's law, Bergman's rule, and the increase of biomass from the equator to the poles with decreasing temperature and increasing mineral nutrient concentrations. Several particular additions to Zenkevich-Bogorov's concept of the biological structure of the Ocean were formulated<sup>10</sup>.

On the use of the plankton DB primary data one should contact the Directorate of the Pacific Branch of Russian Federal Research Institute of Fisheries and Oceanography (TINRO) E-mail: [tinro@tinro-center.ru](mailto:tinro@tinro-center.ru), contact information on the site: <http://www.tinro.vniro.ru/en/contacts>; or Directorate of the Russian Federal Research Institute of Fisheries and Oceanography (VNIRO) E-mail: [vniro@vniro.ru](mailto:vniro@vniro.ru), contact information on the site: <http://vniro.ru/en/about-vniro/contacts>.

All **References** are in the main text of the paper

---

<sup>9</sup> This means that the common practice by trophologists of attempting to replace the day-time catch in plankton nets with the night-time catches to assess the food reserves for fish will yield significantly different results in these waters.

<sup>10</sup> In the supplementary material to this paper are given maps of the spatial distribution of these integral characteristics of net zooplankton in the Far Eastern seas and North Pacific.

**Examples of tables from the tabular reference books**

**Table 3** from Volkov AF, Volvenko IV (2016a) Net Zooplankton of the Western Part of the Bering Sea: Occurrence, Abundance, and Biomass. 1986-2013. TINRO-Center, Vladivostok

The abundance of zooplankton in epipelagial regardless of season and time of day. Averaging data over the entire observation period. Region No. 1 (92 stations)

| Species<br>or taxonomic group        | Frac-<br>tion | Stage or<br>size group | C.E. | Occurrence |       | Number, ind./m <sup>3</sup> |           |                    | Biomass, mg/m <sup>3</sup> |          |                  |
|--------------------------------------|---------------|------------------------|------|------------|-------|-----------------------------|-----------|--------------------|----------------------------|----------|------------------|
|                                      |               |                        |      | samples    | %     | Min                         | Max       | Average            | Min                        | Max      | Average          |
| <i>Acartia longiremis</i>            | S             | -                      | 1.50 | 16         | 17.39 | 0.250                       | 1042.500  | 17.816 ± 11.564    | 0.013                      | 52.125   | 0.873 ± 0.576    |
| <i>Acartia longiremis</i>            | M             | -                      | 2.00 | 14         | 15.22 | 0.851                       | 24.691    | 1.040 ± 0.363      | 0.138                      | 4.000    | 0.168 ± 0.059    |
| <i>Acartia tumida</i>                | M             | -                      | 2.00 | 9          | 9.78  | 0.488                       | 218.667   | 6.061 ± 3.177      | 0.073                      | 32.800   | 0.909 ± 0.477    |
| <i>Aglantha digitale</i>             | M             | -                      | 1.00 | 6          | 6.52  | 0.100                       | 13.333    | 0.254 ± 0.154      | 0.132                      | 17.560   | 0.335 ± 0.203    |
| <i>Aglantha digitale</i>             | L             | -                      | 1.00 | 22         | 23.91 | 0.013                       | 1.864     | 0.097 ± 0.031      | 1.950                      | 279.600  | 14.688 ± 4.615   |
| <i>Balanus sp.</i>                   | S             | cypris                 | 1.00 | 8          | 8.70  | 2.000                       | 6200.000  | 116.587 ± 75.869   | 0.100                      | 310.000  | 5.829 ± 3.793    |
| <i>Balanus sp.</i>                   | S             | nauplius               | 1.00 | 36         | 39.13 | 12.500                      | 33750.000 | 1093.787 ± 449.601 | 0.200                      | 540.000  | 16.961 ± 7.159   |
| <i>Balanus sp.</i>                   | M             | cypris                 | 1.00 | 20         | 21.74 | 1.333                       | 194.333   | 6.524 ± 2.798      | 0.303                      | 44.114   | 1.481 ± 0.635    |
| <i>Balanus sp.</i>                   | M             | nauplius               | 1.00 | 18         | 19.57 | 0.500                       | 4640.351  | 163.907 ± 75.432   | 0.057                      | 529.000  | 18.685 ± 8.599   |
| <i>Beroe cucumis</i>                 | L             | -                      | 1.00 | 4          | 4.35  | 0.179                       | 45.644    | 0.529 ± 0.499      | 32.932                     | 8397.400 | 97.379 ± 91.865  |
| <i>Bivalvia gen. sp.</i>             | S             | larvae                 | 1.00 | 29         | 31.52 | 1.000                       | 5250.000  | 319.483 ± 93.018   | 0.008                      | 42.000   | 2.556 ± 0.744    |
| <i>Brachyura+Lithodidae gen. sp.</i> | L             | larvae                 | 2.00 | 13         | 14.13 | 0.026                       | 9.233     | 0.300 ± 0.129      | 0.200                      | 71.768   | 2.330 ± 1.005    |
| <i>Bradyidius pacificus</i>          | L             | -                      | 2.00 | 2          | 2.17  | 0.318                       | 0.846     | 0.013 ± 0.010      | 0.350                      | 0.930    | 0.014 ± 0.011    |
| <i>Calanus glacialis+marshallae</i>  | M             | -                      | 2.00 | 37         | 40.22 | 0.851                       | 138.182   | 10.008 ± 2.445     | 0.386                      | 62.596   | 4.534 ± 1.108    |
| <i>Calanus glacialis+marshallae</i>  | L             | -                      | 2.00 | 72         | 78.26 | 1.324                       | 240.453   | 24.342 ± 4.836     | 3.100                      | 622.300  | 64.185 ± 12.875  |
| <i>Caridea gen. sp.</i>              | L             | larvae                 | 2.00 | 6          | 6.52  | 0.100                       | 3.281     | 0.062 ± 0.039      | 0.302                      | 9.918    | 0.188 ± 0.116    |
| <i>Centropages abdominalis</i>       | S             | -                      | 1.50 | 35         | 38.04 | 0.167                       | 1125.000  | 65.246 ± 18.802    | 0.010                      | 57.700   | 3.371 ± 0.999    |
| <i>Centropages abdominalis</i>       | M             | -                      | 2.00 | 48         | 52.17 | 1.500                       | 977.500   | 95.975 ± 23.591    | 0.225                      | 146.625  | 14.396 ± 3.539   |
| <i>Clione limacina</i>               | S             | -                      | 1.00 | 5          | 5.43  | 1.667                       | 50.847    | 1.411 ± 0.770      | 0.067                      | 2.034    | 0.056 ± 0.031    |
| <i>Clione limacina</i>               | M             | -                      | 2.00 | 6          | 6.52  | 0.444                       | 2.889     | 0.086 ± 0.040      | 0.400                      | 2.600    | 0.076 ± 0.036    |
| <i>Clione limacina</i>               | L             | -                      | 2.00 | 12         | 13.04 | 0.017                       | 0.238     | 0.017 ± 0.005      | 0.850                      | 11.900   | 0.833 ± 0.270    |
| <i>Copepoda gen. sp.</i>             | S             | nauplius               | 1.00 | 64         | 69.57 | 0.667                       | 2291.667  | 288.179 ± 46.867   | 0.010                      | 30.000   | 3.942 ± 0.650    |
| <i>Copepoda gen. sp.</i>             | S             | ova                    | 1.00 | 12         | 13.04 | 2.500                       | 187.500   | 14.057 ± 4.388     | 0.010                      | 0.750    | 0.056 ± 0.018    |
| <i>Cumacea gen. sp.</i>              | M             | -                      | 1.00 | 1          | 1.09  | 2.800                       | 2.800     | 0.030 ± 0.031      | 1.400                      | 1.400    | 0.015 ± 0.015    |
| <i>Cumacea gen. sp.</i>              | L             | -                      | 2.00 | 4          | 4.35  | 5.846                       | 13.121    | 0.388 ± 0.203      | 108.459                    | 243.455  | 7.195 ± 3.772    |
| <i>Echinodermata gen. sp.</i>        | S             | larvae                 | 1.00 | 4          | 4.35  | 16.667                      | 76.271    | 1.825 ± 1.037      | 0.133                      | 0.610    | 0.015 ± 0.008    |
| <i>Eucalanus bungii</i>              | S             | -                      | 1.50 | 3          | 3.26  | 104.651                     | 272.727   | 5.461 ± 3.444      | 9.105                      | 23.727   | 0.475 ± 0.300    |
| <i>Eucalanus bungii</i>              | M             | -                      | 2.00 | 38         | 41.30 | 0.588                       | 1200.000  | 26.098 ± 13.652    | 1.176                      | 2400.000 | 52.195 ± 27.304  |
| <i>Eucalanus bungii</i>              | L             | -                      | 2.00 | 79         | 85.87 | 0.171                       | 236.493   | 26.653 ± 4.228     | 1.200                      | 1797.351 | 195.911 ± 31.555 |
| <i>Euphausia gen. sp.</i>            | L             | furcilia               | 2.00 | 31         | 33.70 | 0.465                       | 45.793    | 3.739 ± 0.877      | 1.395                      | 137.379  | 11.067 ± 2.620   |
| <i>Euphausiacea gen. sp.</i>         | S             | calytopis              | 1.00 | 1          | 1.09  | 88.750                      | 88.750    | 0.965 ± 0.970      | 7.100                      | 7.100    | 0.077 ± 0.078    |
| <i>Euphausiacea gen. sp.</i>         | S             | nauplius               | 1.00 | 2          | 2.17  | 22.727                      | 46.875    | 0.757 ± 0.567      | 1.023                      | 2.109    | 0.034 ± 0.026    |
| <i>Euphausiacea gen. sp.</i>         | S             | ova                    | 1.00 | 1          | 1.09  | 525.000                     | 525.000   | 5.707 ± 5.738      | 15.750                     | 15.750   | 0.171 ± 0.172    |
| <i>Euphausiacea gen. sp.</i>         | M             | calytopis              | 2.00 | 17         | 18.48 | 0.476                       | 37.037    | 1.841 ± 0.575      | 0.197                      | 15.296   | 0.760 ± 0.237    |
| <i>Euphausiacea gen. sp.</i>         | M             | furcilia               | 2.00 | 5          | 5.43  | 0.500                       | 26.750    | 0.429 ± 0.301      | 0.900                      | 48.150   | 0.772 ± 0.542    |
| <i>Euphausiacea gen. sp.</i>         | M             | juvenis                | 2.00 | 3          | 3.26  | 1.026                       | 111.111   | 2.042 ± 1.462      | 1.846                      | 200.000  | 3.676 ± 2.632    |

|                                        |   |           |      |    |       |         |           |                    |        |          |                  |
|----------------------------------------|---|-----------|------|----|-------|---------|-----------|--------------------|--------|----------|------------------|
| <i>Eurytemora herdmani</i>             | M | -         | 2.00 | 1  | 1.09  | 1.700   | 1.700     | 0.018 ± 0.019      | 0.097  | 0.097    | 0.001 ± 0.001    |
| <i>Evadne sp.</i>                      | S | -         | 1.00 | 1  | 1.09  | 30.000  | 30.000    | 0.326 ± 0.328      | 0.900  | 0.900    | 0.010 ± 0.010    |
| <i>Fritillaria sp.</i>                 | S | -         | 1.00 | 13 | 14.13 | 20.000  | 415.385   | 20.998 ± 7.604     | 0.392  | 7.062    | 0.381 ± 0.136    |
| Gammaridae gen. sp.                    | M | -         | 1.50 | 2  | 2.17  | 1.333   | 2.800     | 0.045 ± 0.034      | 0.761  | 1.400    | 0.023 ± 0.017    |
| Gammaridae gen. sp.                    | L | -         | 2.00 | 9  | 9.78  | 0.035   | 4.782     | 0.144 ± 0.072      | 0.350  | 47.820   | 1.444 ± 0.717    |
| <i>Globigerina sp.</i>                 | S | -         | 1.00 | 1  | 1.09  | 107.143 | 107.143   | 1.165 ± 1.171      | 0.857  | 0.857    | 0.009 ± 0.009    |
| <i>Limacina helicina</i>               | S | -         | 1.00 | 13 | 14.13 | 0.667   | 226.667   | 9.106 ± 3.352      | 0.010  | 3.400    | 0.137 ± 0.050    |
| <i>Limacina helicina</i>               | M | -         | 1.00 | 14 | 15.22 | 0.167   | 13.559    | 0.547 ± 0.204      | 0.080  | 6.468    | 0.261 ± 0.097    |
| <i>Limacina helicina</i>               | L | -         | 1.00 | 12 | 13.04 | 0.160   | 4.302     | 0.192 ± 0.072      | 0.595  | 16.000   | 0.714 ± 0.268    |
| <i>Metridia pacifica</i>               | M | -         | 2.00 | 55 | 59.78 | 0.920   | 1479.290  | 67.995 ± 20.308    | 0.622  | 1000.000 | 45.923 ± 13.730  |
| <i>Metridia pacifica</i>               | L | -         | 2.00 | 44 | 47.83 | 0.111   | 35.556    | 4.135 ± 0.785      | 0.100  | 32.000   | 3.675 ± 0.704    |
| <i>Metridia sp.</i>                    | S | copepodit | 1.50 | 27 | 29.35 | 27.500  | 1175.000  | 69.650 ± 18.500    | 1.100  | 47.000   | 2.749 ± 0.736    |
| <i>Metridia sp.</i>                    | M | copepodit | 2.00 | 36 | 39.13 | 3.404   | 972.973   | 67.249 ± 17.713    | 1.021  | 291.892  | 20.175 ± 5.314   |
| <i>Microcalanus pygmaeus</i>           | S | -         | 1.50 | 26 | 28.26 | 20.270  | 340.000   | 30.268 ± 7.262     | 0.284  | 4.760    | 0.424 ± 0.102    |
| <i>Microsetella sp.</i>                | S | -         | 1.50 | 21 | 22.83 | 0.588   | 1541.176  | 30.049 ± 17.046    | 0.010  | 26.200   | 0.553 ± 0.292    |
| Mysida gen.sp.                         | M | larvae    | 1.00 | 2  | 2.17  | 0.480   | 6.471     | 0.076 ± 0.071      | 0.082  | 1.100    | 0.013 ± 0.012    |
| Mysida gen.sp.                         | L | -         | 2.00 | 5  | 5.43  | 0.433   | 28.698    | 0.341 ± 0.314      | 26.000 | 1721.900 | 20.446 ± 18.822  |
| Mysida gen.sp.                         | L | <10 mm    | 2.00 | 4  | 4.35  | 0.317   | 1.026     | 0.028 ± 0.015      | 0.606  | 2.373    | 0.063 ± 0.034    |
| <i>Neocalanus cristatus</i>            | L | -         | 2.00 | 48 | 52.17 | 0.290   | 37.500    | 2.685 ± 0.595      | 2.900  | 300.000  | 23.837 ± 4.947   |
| <i>Neocalanus plumchrus+flemingeri</i> | M | -         | 2.00 | 9  | 9.78  | 2.791   | 285.714   | 5.049 ± 3.266      | 1.086  | 100.000  | 1.768 ± 1.143    |
| <i>Neocalanus plumchrus+flemingeri</i> | L | -         | 2.00 | 82 | 89.13 | 0.600   | 294.400   | 29.250 ± 4.968     | 1.500  | 736.000  | 75.649 ± 12.648  |
| <i>Neocalanus sp.</i>                  | S | copepodit | 1.50 | 13 | 14.13 | 42.857  | 3243.243  | 71.035 ± 44.027    | 1.586  | 120.000  | 2.628 ± 1.629    |
| <i>Neocalanus sp.</i>                  | M | copepodit | 2.00 | 8  | 8.70  | 1.333   | 34.884    | 0.984 ± 0.507      | 0.468  | 12.244   | 0.345 ± 0.178    |
| <i>Oikopleura vanhoeffeni</i>          | S | -         | 1.00 | 14 | 15.22 | 4.348   | 735.294   | 26.445 ± 10.799    | 0.148  | 25.000   | 0.899 ± 0.367    |
| <i>Oikopleura vanhoeffeni</i>          | M | -         | 1.00 | 49 | 53.26 | 0.476   | 677.778   | 36.089 ± 11.239    | 0.041  | 61.000   | 3.231 ± 1.011    |
| <i>Oikopleura vanhoeffeni</i>          | L | -         | 2.00 | 44 | 47.83 | 0.168   | 99.400    | 5.777 ± 1.610      | 0.336  | 198.800  | 11.555 ± 3.220   |
| <i>Oithona similis</i>                 | S | -         | 1.50 | 67 | 72.83 | 14.286  | 21428.572 | 1531.171 ± 322.351 | 0.200  | 300.000  | 21.802 ± 4.521   |
| Ostracoda gen. sp.                     | M | -         | 1.00 | 7  | 7.61  | 0.455   | 4.706     | 0.169 ± 0.076      | 0.190  | 1.962    | 0.071 ± 0.032    |
| Paguridae gen. sp.                     | L | larvae    | 2.00 | 5  | 5.43  | 0.143   | 1.083     | 0.031 ± 0.017      | 0.502  | 3.800    | 0.109 ± 0.058    |
| <i>Paraeuchaeta elongata</i>           | L | -         | 2.00 | 3  | 3.26  | 0.875   | 1.072     | 0.031 ± 0.018      | 3.673  | 4.502    | 0.129 ± 0.074    |
| <i>Parasagitta elegans</i>             | M | -         | 2.00 | 19 | 20.65 | 0.455   | 52.000    | 2.320 ± 0.875      | 0.091  | 10.400   | 0.462 ± 0.175    |
| <i>Parasagitta elegans</i>             | L | -         | 10.0 | 47 | 51.09 | 0.173   | 149.167   | 9.971 ± 2.349      | 3.800  | 3126.235 | 215.837 ± 50.394 |
| <i>Parasagitta elegans</i>             | L | <10 mm    | 2.00 | 11 | 11.96 | 0.563   | 10.606    | 0.384 ± 0.156      | 0.450  | 7.424    | 0.293 ± 0.113    |
| <i>Parasagitta elegans</i>             | L | 10-20 mm  | 5.00 | 41 | 44.57 | 0.893   | 134.167   | 11.107 ± 2.571     | 4.651  | 698.742  | 59.545 ± 13.690  |
| <i>Parasagitta elegans</i>             | L | 20-25 mm  | 10.0 | 23 | 25.00 | 1.587   | 121.667   | 3.820 ± 1.534      | 27.119 | 1825.800 | 61.673 ± 23.854  |
| <i>Parasagitta elegans</i>             | L | 25-30 mm  | 10.0 | 10 | 10.87 | 1.333   | 8.696     | 0.345 ± 0.130      | 37.120 | 260.652  | 10.858 ± 4.040   |
| <i>Parasagitta elegans</i>             | L | >30 mm    | 10.0 | 4  | 4.35  | 1.852   | 3.333     | 0.111 ± 0.057      | 87.389 | 181.939  | 5.680 ± 2.942    |
| Polychaeta gen. sp.                    | S | larvae    | 1.00 | 38 | 41.30 | 6.667   | 8375.000  | 878.127 ± 193.489  | 0.187  | 234.500  | 24.548 ± 5.418   |
| Polychaeta gen. sp.                    | M | larvae    | 1.00 | 15 | 16.30 | 1.127   | 228.475   | 6.375 ± 3.212      | 1.005  | 203.800  | 5.686 ± 2.865    |
| Polychaeta gen. sp.                    | L | larvae    | 2.00 | 5  | 5.43  | 0.060   | 5.067     | 0.069 ± 0.056      | 0.090  | 7.600    | 0.103 ± 0.084    |
| <i>Primno macropa</i>                  | M | -         | 1.50 | 1  | 1.09  | 1.500   | 1.500     | 0.016 ± 0.016      | 1.500  | 1.500    | 0.016 ± 0.016    |
| <i>Primno macropa</i>                  | L | -         | 3.00 | 1  | 1.09  | 0.765   | 0.765     | 0.008 ± 0.008      | 13.000 | 13.000   | 0.141 ± 0.142    |
| <i>Pseudocalanus minutus</i>           | M | -         | 2.00 | 84 | 91.30 | 18.133  | 3711.667  | 407.100 ± 67.928   | 2.285  | 445.400  | 49.094 ± 8.144   |
| <i>Pseudocalanus newmani</i>           | S | -         | 1.50 | 14 | 15.22 | 102.273 | 1880.000  | 99.603 ± 34.758    | 4.091  | 75.200   | 3.984 ± 1.390    |

|                                                         |   |          |      |    |       |        |           |                    |         |          |                    |
|---------------------------------------------------------|---|----------|------|----|-------|--------|-----------|--------------------|---------|----------|--------------------|
| <i>Pseudocalanus</i> sp.                                | S | -        | 1.50 | 72 | 78.26 | 27.778 | 10500.000 | 830.337 ± 158.724  | 1.111   | 420.000  | 33.213 ± 6.349     |
| <i>Pseudocalanus</i> sp.                                | M | -        | 2.00 | 15 | 16.30 | 27.179 | 565.833   | 26.255 ± 8.514     | 2.446   | 50.925   | 2.363 ± 0.766      |
| <i>Racovitzanus antarcticus</i>                         | M | -        | 2.00 | 1  | 1.09  | 1.127  | 1.127     | 0.012 ± 0.012      | 0.316   | 0.316    | 0.003 ± 0.003      |
| <i>Scolecithricella minor</i>                           | S | -        | 1.50 | 4  | 4.35  | 0.667  | 12.500    | 0.169 ± 0.138      | 0.049   | 1.000    | 0.013 ± 0.011      |
| <i>Scolecithricella minor</i>                           | M | -        | 2.00 | 10 | 10.87 | 0.851  | 10.000    | 0.401 ± 0.149      | 0.162   | 1.600    | 0.073 ± 0.026      |
| <i>Themisto libellula</i>                               | L | -        | 5.00 | 7  | 7.61  | 0.048  | 16.000    | 0.309 ± 0.193      | 3.600   | 1200.000 | 23.161 ± 14.494    |
| <i>Themisto libellula</i>                               | L | 5-10 mm  | 3.00 | 11 | 11.96 | 0.455  | 1.837     | 0.103 ± 0.033      | 6.370   | 25.718   | 1.436 ± 0.468      |
| <i>Themisto libellula</i>                               | L | 10-20 mm | 5.00 | 11 | 11.96 | 0.758  | 22.500    | 0.521 ± 0.266      | 77.316  | 2064.533 | 50.356 ± 24.774    |
| <i>Themisto pacifica</i>                                | S | -        | 1.00 | 1  | 1.09  | 5.000  | 5.000     | 0.054 ± 0.055      | 0.690   | 0.690    | 0.007 ± 0.008      |
| <i>Themisto pacifica</i>                                | M | -        | 2.00 | 6  | 6.52  | 2.667  | 12.424    | 0.432 ± 0.201      | 1.760   | 8.200    | 0.285 ± 0.133      |
| <i>Themisto pacifica</i>                                | L | -        | 3.00 | 11 | 11.96 | 0.046  | 4.154     | 0.096 ± 0.050      | 0.600   | 54.000   | 1.237 ± 0.650      |
| <i>Themisto pacifica</i>                                | L | <5 mm    | 2.00 | 10 | 10.87 | 0.234  | 1.533     | 0.057 ± 0.022      | 0.352   | 2.300    | 0.094 ± 0.035      |
| <i>Themisto pacifica</i>                                | L | 5-7 mm   | 3.00 | 3  | 3.26  | 0.441  | 0.769     | 0.018 ± 0.011      | 2.500   | 4.538    | 0.106 ± 0.063      |
| <i>Themisto pacifica</i>                                | L | 7-10 mm  | 3.00 | 2  | 2.17  | 0.289  | 2.167     | 0.027 ± 0.024      | 4.340   | 32.500   | 0.400 ± 0.358      |
| <i>Thysanoessa inermis</i>                              | L | -        | 10.0 | 11 | 11.96 | 0.102  | 4.838     | 0.221 ± 0.087      | 6.600   | 314.500  | 13.452 ± 5.376     |
| <i>Thysanoessa inermis</i>                              | L | <10 mm   | 3.00 | 1  | 1.09  | 0.700  | 0.700     | 0.008 ± 0.008      | 2.100   | 2.100    | 0.023 ± 0.023      |
| <i>Thysanoessa inermis</i>                              | L | 10-20 mm | 5.00 | 3  | 3.26  | 2.326  | 3.676     | 0.092 ± 0.054      | 65.116  | 102.941  | 2.588 ± 1.520      |
| <i>Thysanoessa inermis</i>                              | L | 20-25 mm | 10.0 | 1  | 1.09  | 1.667  | 1.667     | 0.018 ± 0.018      | 133.360 | 133.360  | 1.450 ± 1.458      |
| <i>Thysanoessa longipes</i>                             | L | -        | 5.00 | 3  | 3.26  | 0.015  | 0.588     | 0.007 ± 0.006      | 1.300   | 47.564   | 0.603 ± 0.524      |
| <i>Thysanoessa longipes</i>                             | L | <10 mm   | 3.00 | 4  | 4.35  | 0.313  | 1.150     | 0.028 ± 0.015      | 1.406   | 4.600    | 0.114 ± 0.062      |
| <i>Thysanoessa raschii</i>                              | L | -        | 10.0 | 19 | 20.65 | 0.053  | 34.286    | 1.427 ± 0.577      | 3.700   | 2400.000 | 103.161 ± 41.090   |
| <i>Thysanoessa raschii</i>                              | L | <10 mm   | 3.00 | 16 | 17.39 | 0.313  | 36.786    | 1.372 ± 0.544      | 1.153   | 135.556  | 5.069 ± 1.990      |
| <i>Thysanoessa raschii</i>                              | L | 10-20 mm | 5.00 | 1  | 1.09  | 0.833  | 0.833     | 0.009 ± 0.009      | 20.825  | 20.825   | 0.226 ± 0.228      |
| <i>Triconia borealis</i>                                | S | -        | 1.50 | 36 | 39.13 | 2.000  | 570.423   | 48.358 ± 10.401    | 0.066   | 18.824   | 1.562 ± 0.336      |
| Amphipods                                               |   |          |      |    |       |        |           | 1.831 ± 0.403      |         |          | 78.707 ± 28.725    |
| Copepods                                                |   |          |      |    |       |        |           | 3902.751 ± 376.840 |         |          | 630.994 ± 49.587   |
| Cladocerans                                             |   |          |      |    |       |        |           | 0.326 ± 0.328      |         |          | 0.010 ± 0.010      |
| Gelatinous (jellyfish. comb jellies. pelagic tunicates) |   |          |      |    |       |        |           | 90.190 ± 17.425    |         |          | 128.467 ± 92.044   |
| Pteropods                                               |   |          |      |    |       |        |           | 11.358 ± 3.447     |         |          | 2.076 ± 0.398      |
| Cumaceans                                               |   |          |      |    |       |        |           | 0.418 ± 0.206      |         |          | 7.211 ± 3.772      |
| Meroplankton (larvae of benthic animals)                |   |          |      |    |       |        |           | 2587.077 ± 509.604 |         |          | 78.492 ± 13.384    |
| Mysids                                                  |   |          |      |    |       |        |           | 0.444 ± 0.322      |         |          | 20.521 ± 18.822    |
| Protists                                                |   |          |      |    |       |        |           | 1.165 ± 1.171      |         |          | 0.009 ± 0.009      |
| Ostracods                                               |   |          |      |    |       |        |           | 0.169 ± 0.076      |         |          | 0.071 ± 0.032      |
| Chaetognaths                                            |   |          |      |    |       |        |           | 28.059 ± 3.910     |         |          | 354.348 ± 57.628   |
| Euphausiids                                             |   |          |      |    |       |        |           | 18.663 ± 6.177     |         |          | 143.245 ± 41.715   |
| Entire zooplankton                                      |   |          |      |    |       |        |           | 6642.451 ± 634.094 |         |          | 1444.150 ± 131.776 |

Note. Here and in following tables: C.E. - catch efficiency correction coefficient; Fraction "S" - small (fine). "M" - mean. "L" - large (coarse); Stage or size group "-" - not subdivided; the value 0.000 means <0.0005. Numbers for the regions as in Fig. 5.

**Table 4** from Volkov AF. Volvenko IV (2016a) Net Zooplankton of the Western Part of the Bering Sea: Occurrence, Abundance, and Biomass. 1986-2013. TINRO-Center, Vladivostok

The abundance of zooplankton in epipelagial regardless of season and time of day. Averaging data over the entire observation period. Region No. 2 (268 stations)

| Species<br>or taxonomic group       | Frac-<br>tion | Stage or<br>size group | C.E. | Occurrence |       | Number. ind./m <sup>3</sup> |           |                   | Biomass. mg/m <sup>3</sup> |          |                  |
|-------------------------------------|---------------|------------------------|------|------------|-------|-----------------------------|-----------|-------------------|----------------------------|----------|------------------|
|                                     |               |                        |      | samples    | %     | Min                         | Max       | Average           | Min                        | Max      | Average          |
| <i>Acartia longiremis</i>           | S             | -                      | 1.50 | 66         | 24.63 | 1.800                       | 1600.000  | 16.307 ± 6.197    | 0.090                      | 80.000   | 0.805 ± 0.310    |
| <i>Acartia longiremis</i>           | M             | -                      | 2.00 | 35         | 13.06 | 0.556                       | 607.407   | 3.598 ± 2.310     | 0.090                      | 98.400   | 0.583 ± 0.374    |
| <i>Acartia tumida</i>               | S             | -                      | 1.50 | 2          | 0.75  | 65.000                      | 290.000   | 1.325 ± 1.110     | 6.500                      | 29.000   | 0.132 ± 0.111    |
| <i>Acartia tumida</i>               | M             | -                      | 2.00 | 16         | 5.97  | 0.952                       | 14619.999 | 65.977 ± 54.855   | 0.143                      | 2193.000 | 9.897 ± 8.228    |
| <i>Aglantha digitale</i>            | M             | -                      | 1.00 | 13         | 4.85  | 0.060                       | 12.301    | 0.188 ± 0.075     | 0.079                      | 16.200   | 0.248 ± 0.099    |
| <i>Aglantha digitale</i>            | L             | -                      | 1.00 | 91         | 33.96 | 0.001                       | 5.875     | 0.166 ± 0.039     | 0.150                      | 881.250  | 24.926 ± 5.919   |
| <i>Balanus sp.</i>                  | S             | cypris                 | 1.00 | 8          | 2.99  | 34.091                      | 3474.000  | 39.299 ± 17.073   | 1.636                      | 173.700  | 1.965 ± 0.854    |
| <i>Balanus sp.</i>                  | S             | nauplius               | 1.00 | 104        | 38.81 | 1.800                       | 51406.250 | 628.756 ± 237.846 | 0.025                      | 822.500  | 9.823 ± 3.798    |
| <i>Balanus sp.</i>                  | M             | cypris                 | 1.00 | 43         | 16.04 | 0.333                       | 563.158   | 10.990 ± 3.388    | 0.076                      | 127.837  | 2.495 ± 0.769    |
| <i>Balanus sp.</i>                  | M             | nauplius               | 1.00 | 62         | 23.13 | 0.167                       | 4657.895  | 53.133 ± 23.069   | 0.019                      | 531.000  | 6.057 ± 2.630    |
| <i>Beroe cucumis</i>                | L             | -                      | 1.00 | 9          | 3.36  | 0.064                       | 4.818     | 0.039 ± 0.023     | 11.774                     | 886.396  | 7.192 ± 4.218    |
| Bivalvia gen. sp.                   | S             | larvae                 | 1.00 | 125        | 46.64 | 1.000                       | 7499.999  | 256.113 ± 49.598  | 0.008                      | 60.000   | 2.049 ± 0.397    |
| Brachyura+Lithodidae gen. sp.       | L             | larvae                 | 2.00 | 87         | 32.46 | 0.027                       | 90.600    | 2.291 ± 0.570     | 0.210                      | 704.234  | 17.814 ± 4.431   |
| <i>Bradyidius pacificus</i>         | S             | -                      | 1.50 | 3          | 1.12  | 8.889                       | 64.444    | 0.330 ± 0.249     | 0.800                      | 5.800    | 0.030 ± 0.022    |
| <i>Bradyidius pacificus</i>         | M             | -                      | 2.00 | 7          | 2.61  | 1.000                       | 5.600     | 0.063 ± 0.028     | 0.494                      | 2.800    | 0.031 ± 0.014    |
| <i>Bradyidius pacificus</i>         | L             | -                      | 2.00 | 1          | 0.37  | 0.264                       | 0.264     | 0.001 ± 0.001     | 0.361                      | 0.361    | 0.001 ± 0.001    |
| <i>Calanus glacialis+marshallae</i> | M             | -                      | 2.00 | 100        | 37.31 | 0.357                       | 52.632    | 3.741 ± 0.499     | 0.162                      | 23.842   | 1.697 ± 0.226    |
| <i>Calanus glacialis+marshallae</i> | L             | -                      | 2.00 | 200        | 74.63 | 0.105                       | 250.208   | 10.217 ± 1.414    | 0.286                      | 582.985  | 26.186 ± 3.536   |
| <i>Candacia columbiae</i>           | L             | -                      | 2.00 | 1          | 0.37  | 0.277                       | 0.277     | 0.001 ± 0.001     | 0.858                      | 0.858    | 0.003 ± 0.003    |
| Caridea gen. sp.                    | L             | larvae                 | 2.00 | 27         | 10.07 | 0.100                       | 7.019     | 0.196 ± 0.048     | 0.302                      | 21.218   | 0.580 ± 0.142    |
| <i>Centropages abdominalis</i>      | S             | -                      | 1.50 | 116        | 43.28 | 0.167                       | 7928.570  | 152.009 ± 42.929  | 0.010                      | 396.429  | 7.742 ± 2.152    |
| <i>Centropages abdominalis</i>      | M             | -                      | 2.00 | 133        | 49.63 | 0.067                       | 4452.000  | 104.279 ± 24.376  | 0.010                      | 667.800  | 15.642 ± 3.656   |
| <i>Clione limacina</i>              | S             | -                      | 1.00 | 9          | 3.36  | 1.667                       | 61.224    | 0.851 ± 0.337     | 0.067                      | 2.449    | 0.034 ± 0.013    |
| <i>Clione limacina</i>              | M             | -                      | 2.00 | 6          | 2.24  | 0.071                       | 7.444     | 0.051 ± 0.031     | 0.061                      | 6.700    | 0.046 ± 0.027    |
| <i>Clione limacina</i>              | L             | -                      | 2.00 | 35         | 13.06 | 0.000                       | 0.517     | 0.022 ± 0.005     | 0.010                      | 25.862   | 1.071 ± 0.228    |
| Copepoda gen. sp.                   | S             | nauplius               | 1.00 | 212        | 79.10 | 6.300                       | 5384.615  | 456.044 ± 43.776  | 0.082                      | 70.000   | 6.234 ± 0.589    |
| Copepoda gen. sp.                   | S             | ova                    | 1.00 | 22         | 8.21  | 30.000                      | 7500.000  | 39.860 ± 28.160   | 0.120                      | 30.000   | 0.159 ± 0.113    |
| Cumacea gen. sp.                    | M             | -                      | 1.00 | 4          | 1.49  | 1.000                       | 13.151    | 0.079 ± 0.053     | 0.585                      | 7.693    | 0.046 ± 0.031    |
| Cumacea gen. sp.                    | L             | -                      | 2.00 | 9          | 3.36  | 0.050                       | 82.713    | 1.061 ± 0.475     | 0.928                      | 1534.657 | 19.686 ± 8.817   |
| Decapoda gen. sp.                   | M             | larvae                 | 2.00 | 3          | 1.12  | 0.526                       | 2.500     | 0.015 ± 0.010     | 0.211                      | 1.000    | 0.006 ± 0.004    |
| <i>Dimophyes arctica</i>            | L             | -                      | 1.00 | 4          | 1.49  | 0.078                       | 0.500     | 0.004 ± 0.002     | 0.700                      | 4.500    | 0.038 ± 0.021    |
| Echinodermata gen. sp.              | S             | larvae                 | 1.00 | 18         | 6.72  | 7.000                       | 7640.000  | 50.233 ± 30.542   | 0.056                      | 61.120   | 0.402 ± 0.244    |
| <i>Epilabidocera amphitrites</i>    | L             | -                      | 2.00 | 1          | 0.37  | 0.050                       | 0.050     | 0.000 ± 0.000     | 0.100                      | 0.100    | 0.000 ± 0.000    |
| <i>Eucalanus bungii</i>             | S             | -                      | 1.50 | 16         | 5.97  | 17.143                      | 278.571   | 5.958 ± 1.881     | 1.200                      | 19.500   | 0.449 ± 0.138    |
| <i>Eucalanus bungii</i>             | M             | -                      | 2.00 | 130        | 48.51 | 0.005                       | 495.000   | 14.438 ± 2.872    | 0.010                      | 990.000  | 28.875 ± 5.744   |
| <i>Eucalanus bungii</i>             | L             | -                      | 2.00 | 218        | 81.34 | 0.043                       | 422.586   | 21.986 ± 3.179    | 0.300                      | 2958.100 | 157.495 ± 22.553 |
| Euphausia gen. sp.                  | L             | furcilia               | 2.00 | 47         | 17.54 | 0.056                       | 45.800    | 1.817 ± 0.381     | 0.168                      | 137.400  | 5.339 ± 1.118    |
| <i>Euphausia pacifica</i>           | L             | -                      | 10.0 | 1          | 0.37  | 0.129                       | 0.129     | 0.000 ± 0.000     | 4.500                      | 4.500    | 0.017 ± 0.017    |

|                                        |   |            |      |     |       |        |           |                    |         |          |                 |
|----------------------------------------|---|------------|------|-----|-------|--------|-----------|--------------------|---------|----------|-----------------|
| Euphausiacea gen. sp.                  | S | calyptopis | 1.00 | 7   | 2.61  | 14.375 | 1406.250  | 10.688 ± 5.951     | 1.150   | 112.500  | 0.855 ± 0.476   |
| Euphausiacea gen. sp.                  | S | nauplius   | 1.00 | 24  | 8.96  | 1.250  | 512.500   | 12.307 ± 3.786     | 0.050   | 22.112   | 0.516 ± 0.158   |
| Euphausiacea gen. sp.                  | S | ova        | 1.00 | 13  | 4.85  | 2.667  | 226.667   | 3.592 ± 1.354      | 0.080   | 6.800    | 0.108 ± 0.041   |
| Euphausiacea gen. sp.                  | M | calyptopis | 2.00 | 58  | 21.64 | 0.020  | 213.333   | 5.673 ± 1.586      | 0.008   | 88.107   | 2.343 ± 0.655   |
| Euphausiacea gen. sp.                  | M | furcilia   | 2.00 | 12  | 4.48  | 0.250  | 385.722   | 1.651 ± 1.444      | 0.450   | 694.300  | 2.971 ± 2.600   |
| Euphausiacea gen. sp.                  | M | juvenis    | 2.00 | 8   | 2.99  | 1.765  | 78.431    | 0.803 ± 0.379      | 3.176   | 141.176  | 1.445 ± 0.682   |
| <i>Eurytemora herdmani</i>             | S | -          | 1.50 | 10  | 3.73  | 5.667  | 234.333   | 1.570 ± 0.917      | 0.136   | 5.624    | 0.038 ± 0.022   |
| <i>Eurytemora herdmani</i>             | M | -          | 2.00 | 10  | 3.73  | 0.400  | 21.000    | 0.151 ± 0.083      | 0.023   | 1.197    | 0.009 ± 0.005   |
| <i>Fritillaria sp.</i>                 | S | -          | 1.00 | 67  | 25.00 | 0.769  | 7138.462  | 143.710 ± 37.325   | 0.013   | 121.354  | 2.513 ± 0.638   |
| <i>Fritillaria sp.</i>                 | M | -          | 1.00 | 1   | 0.37  | 25.000 | 25.000    | 0.093 ± 0.093      | 1.500   | 1.500    | 0.006 ± 0.006   |
| <i>Gaetanus sp.</i>                    | L | -          | 2.00 | 1   | 0.37  | 0.460  | 0.460     | 0.002 ± 0.002      | 0.967   | 0.967    | 0.004 ± 0.004   |
| Gammaridae gen. sp.                    | M | -          | 1.50 | 1   | 0.37  | 0.800  | 0.800     | 0.003 ± 0.003      | 0.400   | 0.400    | 0.001 ± 0.001   |
| Gammaridae gen. sp.                    | L | -          | 2.00 | 67  | 25.00 | 0.024  | 93.900    | 4.231 ± 0.830      | 0.240   | 939.000  | 42.311 ± 8.304  |
| Gastropoda gen. sp.                    | S | larvae     | 1.00 | 3   | 1.12  | 0.500  | 65.000    | 0.282 ± 0.246      | 0.018   | 2.275    | 0.010 ± 0.009   |
| <i>Globigerina sp.</i>                 | S | -          | 1.00 | 1   | 0.37  | 25.862 | 25.862    | 0.097 ± 0.097      | 0.207   | 0.207    | 0.001 ± 0.001   |
| <i>Hyperia galba</i>                   | L | -          | 3.00 | 2   | 0.75  | 0.417  | 0.833     | 0.005 ± 0.003      | 10.302  | 20.578   | 0.115 ± 0.086   |
| <i>Limacina helicina</i>               | S | -          | 1.00 | 43  | 16.04 | 13.333 | 2000.000  | 24.723 ± 8.924     | 0.200   | 30.000   | 0.371 ± 0.134   |
| <i>Limacina helicina</i>               | M | -          | 1.00 | 31  | 11.57 | 0.056  | 36.364    | 0.737 ± 0.233      | 0.027   | 17.346   | 0.352 ± 0.111   |
| <i>Limacina helicina</i>               | L | -          | 1.00 | 34  | 12.69 | 0.040  | 3.012     | 0.072 ± 0.018      | 0.149   | 11.200   | 0.270 ± 0.067   |
| <i>Metridia pacifica</i>               | M | -          | 2.00 | 157 | 58.58 | 0.149  | 1463.908  | 37.669 ± 8.070     | 0.101   | 989.602  | 25.444 ± 5.456  |
| <i>Metridia pacifica</i>               | L | -          | 2.00 | 121 | 45.15 | 0.222  | 503.333   | 7.917 ± 2.261      | 0.200   | 453.000  | 7.107 ± 2.035   |
| <i>Metridia sp.</i>                    | S | copepodit  | 1.50 | 89  | 33.21 | 15.000 | 1405.000  | 66.433 ± 10.581    | 0.600   | 56.200   | 2.636 ± 0.421   |
| <i>Metridia sp.</i>                    | M | copepodit  | 2.00 | 69  | 25.75 | 0.333  | 1063.385  | 21.348 ± 5.369     | 0.100   | 319.016  | 6.404 ± 1.611   |
| <i>Microcalanus pygmaeus</i>           | S | -          | 1.50 | 80  | 29.85 | 1.000  | 620.000   | 30.459 ± 4.633     | 0.014   | 8.680    | 0.427 ± 0.065   |
| <i>Microsetella sp.</i>                | S | -          | 1.50 | 54  | 20.15 | 0.588  | 294.118   | 13.351 ± 2.494     | 0.010   | 5.000    | 0.249 ± 0.044   |
| <i>Mysida gen.sp.</i>                  | M | larvae     | 1.00 | 3   | 1.12  | 0.300  | 104.706   | 0.403 ± 0.392      | 0.051   | 17.800   | 0.069 ± 0.067   |
| <i>Mysida gen.sp.</i>                  | L | -          | 2.00 | 25  | 9.33  | 0.050  | 86.800    | 0.849 ± 0.446      | 3.000   | 5177.533 | 50.704 ± 26.632 |
| <i>Mysida gen.sp.</i>                  | L | <10 mm     | 2.00 | 16  | 5.97  | 0.244  | 5.294     | 0.075 ± 0.030      | 0.564   | 12.251   | 0.177 ± 0.070   |
| <i>Mysida gen.sp.</i>                  | L | 10-20 mm   | 2.00 | 10  | 3.73  | 0.610  | 82.000    | 0.789 ± 0.437      | 11.675  | 1570.054 | 15.086 ± 8.363  |
| <i>Mysida gen.sp.</i>                  | L | 20-25 mm   | 2.00 | 3   | 1.12  | 2.041  | 52.000    | 0.222 ± 0.195      | 196.656 | 4260.000 | 18.555 ± 16.048 |
| <i>Mysida gen.sp.</i>                  | L | >25 mm     | 2.00 | 1   | 0.37  | 5.882  | 5.882     | 0.022 ± 0.022      | 716.694 | 716.694  | 2.674 ± 2.679   |
| <i>Neocalanus cristatus</i>            | L | -          | 2.00 | 110 | 41.04 | 0.150  | 52.725    | 2.213 ± 0.354      | 1.500   | 421.800  | 19.641 ± 2.982  |
| <i>Neocalanus plumchrus+flemingeri</i> | M | -          | 2.00 | 20  | 7.46  | 0.857  | 269.714   | 2.917 ± 1.192      | 0.300   | 94.400   | 1.027 ± 0.418   |
| <i>Neocalanus plumchrus+flemingeri</i> | L | -          | 2.00 | 201 | 75.00 | 0.160  | 330.000   | 19.003 ± 2.263     | 0.400   | 825.000  | 48.800 ± 5.707  |
| <i>Neocalanus sp.</i>                  | S | copepodit  | 1.50 | 24  | 8.96  | 9.868  | 187.500   | 5.785 ± 1.474      | 0.365   | 6.937    | 0.214 ± 0.055   |
| <i>Neocalanus sp.</i>                  | M | copepodit  | 2.00 | 31  | 11.57 | 0.417  | 61.370    | 0.650 ± 0.256      | 0.146   | 21.541   | 0.228 ± 0.090   |
| <i>Oikopleura vanhoeffeni</i>          | S | -          | 1.00 | 42  | 15.67 | 6.522  | 802.941   | 27.371 ± 6.374     | 0.222   | 27.300   | 0.931 ± 0.217   |
| <i>Oikopleura vanhoeffeni</i>          | M | -          | 1.00 | 73  | 27.24 | 0.294  | 786.667   | 28.235 ± 5.824     | 0.026   | 70.800   | 2.494 ± 0.516   |
| <i>Oikopleura vanhoeffeni</i>          | L | -          | 2.00 | 94  | 35.07 | 0.122  | 165.200   | 2.973 ± 0.728      | 0.244   | 330.400  | 5.946 ± 1.457   |
| <i>Oithona similis</i>                 | S | -          | 1.50 | 226 | 84.33 | 18.000 | 16457.143 | 1231.854 ± 140.663 | 0.260   | 230.400  | 17.549 ± 1.975  |
| Ostracoda gen. sp.                     | M | -          | 1.00 | 11  | 4.10  | 0.250  | 12.414    | 0.112 ± 0.054      | 0.104   | 5.177    | 0.047 ± 0.023   |
| Ostracoda gen. sp.                     | L | -          | 1.00 | 5   | 1.87  | 0.050  | 0.227     | 0.003 ± 0.001      | 0.074   | 0.334    | 0.004 ± 0.002   |
| Paguridae gen. sp.                     | L | larvae     | 2.00 | 13  | 4.85  | 0.043  | 21.994    | 0.155 ± 0.089      | 0.151   | 77.200   | 0.544 ± 0.313   |
| <i>Paraeuchaeta elongata</i>           | L | -          | 2.00 | 7   | 2.61  | 0.244  | 1.468     | 0.014 ± 0.006      | 1.024   | 6.166    | 0.059 ± 0.027   |

|                                 |   |          |      |     |       |        |           |                  |         |          |                  |
|---------------------------------|---|----------|------|-----|-------|--------|-----------|------------------|---------|----------|------------------|
| <i>Parasagitta elegans</i>      | S | -        | 1.00 | 6   | 2.24  | 26.286 | 195.714   | 1.671 ± 0.864    | 1.840   | 13.700   | 0.117 ± 0.060    |
| <i>Parasagitta elegans</i>      | M | -        | 2.00 | 93  | 34.70 | 0.103  | 130.286   | 5.091 ± 0.844    | 0.019   | 26.057   | 0.985 ± 0.164    |
| <i>Parasagitta elegans</i>      | L | -        | 10.0 | 113 | 42.16 | 0.018  | 150.909   | 8.604 ± 1.371    | 0.400   | 3320.000 | 186.460 ± 29.794 |
| <i>Parasagitta elegans</i>      | L | <10 mm   | 2.00 | 56  | 20.90 | 0.150  | 30.000    | 0.875 ± 0.200    | 0.120   | 24.000   | 0.717 ± 0.165    |
| <i>Parasagitta elegans</i>      | L | 10-20 mm | 5.00 | 140 | 52.24 | 0.340  | 160.294   | 7.797 ± 0.991    | 1.771   | 834.811  | 40.463 ± 5.144   |
| <i>Parasagitta elegans</i>      | L | 20-25 mm | 10.0 | 100 | 37.31 | 1.030  | 444.000   | 6.721 ± 1.843    | 17.439  | 7587.072 | 113.497 ± 31.207 |
| <i>Parasagitta elegans</i>      | L | 25-30 mm | 10.0 | 33  | 12.31 | 1.220  | 66.667    | 1.123 ± 0.341    | 35.976  | 2299.211 | 36.836 ± 11.272  |
| <i>Parasagitta elegans</i>      | L | >30 mm   | 10.0 | 7   | 2.61  | 1.220  | 4.082     | 0.066 ± 0.026    | 57.951  | 187.755  | 3.353 ± 1.324    |
| <i>Podon leuckartii</i>         | S | -        | 1.00 | 5   | 1.87  | 38.889 | 683.333   | 4.830 ± 2.905    | 1.050   | 18.450   | 0.130 ± 0.078    |
| <i>Podon sp.</i>                | S | -        | 1.00 | 8   | 2.99  | 1.311  | 21.889    | 0.176 ± 0.092    | 0.035   | 0.591    | 0.005 ± 0.002    |
| <i>Polychaeta gen. sp.</i>      | S | larvae   | 1.00 | 125 | 46.64 | 0.144  | 13985.294 | 523.621 ± 89.347 | 0.004   | 391.588  | 14.497 ± 2.455   |
| <i>Polychaeta gen. sp.</i>      | M | larvae   | 1.00 | 74  | 27.61 | 0.333  | 212.332   | 7.366 ± 1.519    | 0.297   | 189.400  | 6.571 ± 1.355    |
| <i>Polychaeta gen. sp.</i>      | L | larvae   | 2.00 | 7   | 2.61  | 0.024  | 3.333     | 0.020 ± 0.013    | 0.036   | 5.000    | 0.030 ± 0.019    |
| <i>Primno macropa</i>           | L | -        | 3.00 | 1   | 0.37  | 0.459  | 0.459     | 0.002 ± 0.002    | 7.800   | 7.800    | 0.029 ± 0.029    |
| <i>Primno macropa</i>           | L | <5 mm    | 2.00 | 2   | 0.75  | 0.200  | 0.314     | 0.002 ± 0.001    | 0.464   | 0.728    | 0.004 ± 0.003    |
| <i>Primno macropa</i>           | L | 5-7 mm   | 3.00 | 1   | 0.37  | 0.733  | 0.733     | 0.003 ± 0.003    | 4.946   | 4.946    | 0.018 ± 0.018    |
| <i>Primno macropa</i>           | L | 7-10 mm  | 3.00 | 1   | 0.37  | 0.130  | 0.130     | 0.000 ± 0.000    | 2.571   | 2.571    | 0.010 ± 0.010    |
| <i>Pseudocalanus minutus</i>    | M | -        | 2.00 | 195 | 72.76 | 0.833  | 3000.000  | 225.227 ± 30.500 | 0.100   | 360.000  | 27.334 ± 3.676   |
| <i>Pseudocalanus newmani</i>    | S | -        | 1.50 | 101 | 37.69 | 4.500  | 3066.667  | 138.939 ± 18.409 | 0.180   | 122.667  | 5.558 ± 0.736    |
| <i>Pseudocalanus sp.</i>        | S | -        | 1.50 | 139 | 51.87 | 0.091  | 6000.000  | 454.385 ± 59.987 | 0.004   | 240.000  | 18.175 ± 2.399   |
| <i>Pseudocalanus sp.</i>        | M | -        | 2.00 | 96  | 35.82 | 1.212  | 1238.333  | 63.517 ± 9.963   | 0.109   | 111.450  | 5.717 ± 0.897    |
| <i>Racovitzanus antarcticus</i> | M | -        | 2.00 | 4   | 1.49  | 0.488  | 1.429     | 0.014 ± 0.008    | 0.137   | 0.400    | 0.004 ± 0.002    |
| <i>Scolecithricella minor</i>   | S | -        | 1.50 | 1   | 0.37  | 4.375  | 4.375     | 0.016 ± 0.016    | 0.350   | 0.350    | 0.001 ± 0.001    |
| <i>Scolecithricella minor</i>   | M | -        | 2.00 | 31  | 11.57 | 0.250  | 22.340    | 0.449 ± 0.115    | 0.047   | 3.574    | 0.076 ± 0.019    |
| <i>Themisto libellula</i>       | L | -        | 5.00 | 16  | 5.97  | 0.303  | 2.760     | 0.059 ± 0.017    | 22.580  | 207.000  | 4.386 ± 1.289    |
| <i>Themisto libellula</i>       | L | 5-10 mm  | 3.00 | 16  | 5.97  | 0.303  | 2.381     | 0.044 ± 0.013    | 4.242   | 33.334   | 0.609 ± 0.182    |
| <i>Themisto libellula</i>       | L | 10-20 mm | 5.00 | 39  | 14.55 | 0.610  | 50.000    | 0.928 ± 0.266    | 62.195  | 5100.000 | 94.370 ± 27.080  |
| <i>Themisto libellula</i>       | L | 20-30 mm | 5.00 | 7   | 2.61  | 0.265  | 4.991     | 0.030 ± 0.019    | 79.500  | 1497.300 | 8.886 ± 5.780    |
| <i>Themisto pacifica</i>        | M | -        | 2.00 | 16  | 5.97  | 0.556  | 8.767     | 0.217 ± 0.066    | 0.367   | 5.786    | 0.143 ± 0.043    |
| <i>Themisto pacifica</i>        | L | -        | 3.00 | 48  | 17.91 | 0.046  | 40.923    | 0.328 ± 0.165    | 0.600   | 532.000  | 4.230 ± 2.148    |
| <i>Themisto pacifica</i>        | L | <5 mm    | 2.00 | 19  | 7.09  | 0.093  | 1.739     | 0.034 ± 0.010    | 0.140   | 2.976    | 0.055 ± 0.016    |
| <i>Themisto pacifica</i>        | L | 5-7 mm   | 3.00 | 9   | 3.36  | 0.341  | 1.875     | 0.027 ± 0.011    | 1.548   | 10.793   | 0.157 ± 0.064    |
| <i>Themisto pacifica</i>        | L | 7-10 mm  | 3.00 | 14  | 5.22  | 0.193  | 1.893     | 0.034 ± 0.011    | 2.900   | 28.400   | 0.497 ± 0.164    |
| <i>Thysanoessa inermis</i>      | L | -        | 10.0 | 28  | 10.45 | 0.006  | 20.000    | 0.249 ± 0.098    | 0.330   | 1100.000 | 14.126 ± 5.435   |
| <i>Thysanoessa inermis</i>      | L | <10 mm   | 3.00 | 28  | 10.45 | 0.033  | 92.967    | 2.242 ± 0.669    | 0.100   | 278.900  | 6.727 ± 2.007    |
| <i>Thysanoessa inermis</i>      | L | 10-20 mm | 5.00 | 28  | 10.45 | 0.151  | 20.000    | 0.307 ± 0.109    | 4.228   | 560.000  | 8.609 ± 3.051    |
| <i>Thysanoessa inermis</i>      | L | 20-25 mm | 10.0 | 6   | 2.24  | 1.250  | 4.054     | 0.055 ± 0.024    | 101.563 | 292.703  | 4.157 ± 1.851    |
| <i>Thysanoessa longipes</i>     | L | -        | 5.00 | 7   | 2.61  | 0.001  | 0.995     | 0.009 ± 0.005    | 0.081   | 84.600   | 0.722 ± 0.426    |
| <i>Thysanoessa longipes</i>     | L | <10 mm   | 3.00 | 7   | 2.61  | 0.285  | 0.896     | 0.014 ± 0.006    | 1.140   | 3.582    | 0.058 ± 0.023    |
| <i>Thysanoessa longipes</i>     | L | 10-20 mm | 5.00 | 4   | 1.49  | 0.482  | 1.958     | 0.019 ± 0.011    | 12.222  | 49.647   | 0.478 ± 0.271    |
| <i>Thysanoessa longipes</i>     | L | 20-25 mm | 10.0 | 5   | 1.87  | 1.282  | 13.486    | 0.102 ± 0.058    | 91.538  | 1024.918 | 7.758 ± 4.433    |
| <i>Thysanoessa longipes</i>     | L | >25 mm   | 10.0 | 2   | 0.75  | 0.476  | 2.597     | 0.011 ± 0.010    | 66.667  | 349.787  | 1.554 ± 1.330    |
| <i>Thysanoessa raschii</i>      | L | -        | 10.0 | 53  | 19.78 | 0.014  | 102.353   | 1.293 ± 0.462    | 1.000   | 8188.235 | 97.619 ± 35.813  |
| <i>Thysanoessa raschii</i>      | L | <10 mm   | 3.00 | 67  | 25.00 | 0.029  | 168.387   | 3.898 ± 1.113    | 0.100   | 620.506  | 14.688 ± 4.249   |

|                                                         |   |          |      |     |       |       |         |                    |        |         |                   |
|---------------------------------------------------------|---|----------|------|-----|-------|-------|---------|--------------------|--------|---------|-------------------|
| <i>Thysanoessa raschii</i>                              | L | 10-20 mm | 5.00 | 14  | 5.22  | 0.676 | 25.641  | 0.233 ± 0.116      | 18.243 | 641.025 | 5.848 ± 2.893     |
| <i>Thysanoessa raschii</i>                              | L | 20-25 mm | 10.0 | 10  | 3.73  | 1.370 | 7.686   | 0.112 ± 0.043      | 94.479 | 591.803 | 8.271 ± 3.262     |
| <i>Tomopteris sp.</i>                                   | L | -        | 2.00 | 1   | 0.37  | 0.392 | 0.392   | 0.001 ± 0.001      | 3.922  | 3.922   | 0.015 ± 0.015     |
| <i>Tomopteris sp.</i>                                   | L | 20 mm    | 2.00 | 1   | 0.37  | 0.392 | 0.392   | 0.001 ± 0.001      | 8.467  | 8.467   | 0.032 ± 0.032     |
| <i>Tortanus discaudatus</i>                             | M | -        | 2.00 | 1   | 0.37  | 0.333 | 0.333   | 0.001 ± 0.001      | 0.057  | 0.057   | 0.000 ± 0.000     |
| <i>Triconia borealis</i>                                | S | -        | 1.50 | 101 | 37.69 | 0.200 | 656.250 | 36.489 ± 5.858     | 0.007  | 21.656  | 1.177 ± 0.189     |
| Amphipods                                               |   |          |      |     |       |       |         | 5.946 ± 0.891      |        |         | 155.822 ± 29.018  |
| Copepods                                                |   |          |      |     |       |       |         | 3256.505 ± 182.374 |        |         | 443.841 ± 27.265  |
| Cladocerans                                             |   |          |      |     |       |       |         | 5.006 ± 2.907      |        |         | 0.135 ± 0.078     |
| Gelatinous (jellyfish. comb jellies. pelagic tunicates) |   |          |      |     |       |       |         | 202.780 ± 38.318   |        |         | 44.293 ± 7.462    |
| Pteropods                                               |   |          |      |     |       |       |         | 26.457 ± 8.934     |        |         | 2.143 ± 0.296     |
| Cumaceans                                               |   |          |      |     |       |       |         | 1.140 ± 0.478      |        |         | 19.733 ± 8.817    |
| Meroplankton (larvae of benthic animals)                |   |          |      |     |       |       |         | 1572.471 ± 262.268 |        |         | 62.842 ± 7.106    |
| Mysids                                                  |   |          |      |     |       |       |         | 2.360 ± 0.764      |        |         | 87.265 ± 32.310   |
| Protozoa                                                |   |          |      |     |       |       |         | 0.097 ± 0.097      |        |         | 0.001 ± 0.001     |
| Other groups                                            |   |          |      |     |       |       |         | 0.003 ± 0.002      |        |         | 0.046 ± 0.035     |
| Ostracods                                               |   |          |      |     |       |       |         | 0.115 ± 0.054      |        |         | 0.051 ± 0.023     |
| Chaetognaths                                            |   |          |      |     |       |       |         | 31.948 ± 2.806     |        |         | 382.428 ± 44.910  |
| Euphausiids                                             |   |          |      |     |       |       |         | 45.076 ± 7.643     |        |         | 184.210 ± 37.373  |
| Entire zooplankton                                      |   |          |      |     |       |       |         | 5149.904 ± 321.977 |        |         | 1382.808 ± 78.912 |



**Table 5** from Volkov AF. Volvenko IV (2016a) Net Zooplankton of the Western Part of the Bering Sea: Occurrence, Abundance, and Biomass. 1986-2013. TINRO-Center. Vladivostok

The abundance of zooplankton in epipelagial regardless of season and time of day. Averaging data over the entire observation period. Region No. 3 (328 stations)

| Species<br>or taxonomic group       | Frac-<br>tion | Stage or<br>size group | C.E. | Occurrence |       | Number. ind./m <sup>3</sup> |           |                   | Biomass. mg/m <sup>3</sup> |          |                  |
|-------------------------------------|---------------|------------------------|------|------------|-------|-----------------------------|-----------|-------------------|----------------------------|----------|------------------|
|                                     |               |                        |      | samples    | %     | Min                         | Max       | Average           | Min                        | Max      | Average          |
| <i>Acartia clausi</i>               | M             | -                      | 1.50 | 1          | 0.30  | 0.500                       | 0.500     | 0.002 ± 0.002     | 0.030                      | 0.030    | 0.000 ± 0.000    |
| <i>Acartia longiremis</i>           | S             | -                      | 1.50 | 72         | 21.95 | 0.250                       | 900.000   | 11.178 ± 3.297    | 0.013                      | 45.000   | 0.535 ± 0.159    |
| <i>Acartia longiremis</i>           | M             | -                      | 2.00 | 28         | 8.54  | 0.440                       | 67.901    | 0.915 ± 0.353     | 0.071                      | 11.000   | 0.148 ± 0.057    |
| <i>Acartia tumida</i>               | S             | -                      | 1.50 | 1          | 0.30  | 0.100                       | 0.100     | 0.000 ± 0.000     | 0.010                      | 0.010    | 0.000 ± 0.000    |
| <i>Acartia tumida</i>               | M             | -                      | 2.00 | 8          | 2.44  | 1.928                       | 6586.667  | 20.295 ± 20.112   | 0.289                      | 988.000  | 3.044 ± 3.017    |
| <i>Aetideus pacificus</i>           | M             | -                      | 2.00 | 2          | 0.61  | 0.317                       | 0.909     | 0.004 ± 0.003     | 0.133                      | 0.382    | 0.002 ± 0.001    |
| <i>Aglantha digitale</i>            | M             | -                      | 1.00 | 16         | 4.88  | 0.250                       | 10.989    | 0.115 ± 0.049     | 0.329                      | 14.473   | 0.151 ± 0.064    |
| <i>Aglantha digitale</i>            | L             | -                      | 1.00 | 129        | 39.33 | 0.003                       | 4.368     | 0.103 ± 0.021     | 0.450                      | 655.172  | 15.460 ± 3.108   |
| <i>Balanus sp.</i>                  | S             | cypris                 | 1.00 | 6          | 1.83  | 36.000                      | 1538.000  | 8.896 ± 5.281     | 1.800                      | 76.900   | 0.445 ± 0.264    |
| <i>Balanus sp.</i>                  | S             | nauplius               | 1.00 | 32         | 9.76  | 17.647                      | 22312.500 | 130.681 ± 78.120  | 0.247                      | 357.000  | 2.079 ± 1.250    |
| <i>Balanus sp.</i>                  | M             | cypris                 | 1.00 | 8          | 2.44  | 2.373                       | 35.088    | 0.221 ± 0.118     | 0.539                      | 7.965    | 0.050 ± 0.027    |
| <i>Balanus sp.</i>                  | M             | nauplius               | 1.00 | 20         | 6.10  | 0.467                       | 592.105   | 4.931 ± 2.412     | 0.053                      | 67.500   | 0.562 ± 0.275    |
| <i>Beroe cucumis</i>                | L             | -                      | 1.00 | 4          | 1.22  | 0.042                       | 0.210     | 0.001 ± 0.001     | 7.727                      | 38.635   | 0.241 ± 0.139    |
| Bivalvia gen. sp.                   | S             | larvae                 | 1.00 | 101        | 30.79 | 1.000                       | 58736.844 | 334.045 ± 191.909 | 0.008                      | 469.895  | 2.609 ± 1.516    |
| Brachyura+Lithodidae gen. sp.       | L             | larvae                 | 2.00 | 77         | 23.48 | 0.027                       | 61.875    | 0.748 ± 0.225     | 0.210                      | 480.954  | 5.816 ± 1.746    |
| <i>Bradyidius pacificus</i>         | S             | -                      | 1.50 | 1          | 0.30  | 10.000                      | 10.000    | 0.030 ± 0.031     | 0.900                      | 0.900    | 0.003 ± 0.003    |
| <i>Bradyidius pacificus</i>         | M             | -                      | 2.00 | 5          | 1.52  | 0.100                       | 10.204    | 0.055 ± 0.034     | 0.050                      | 5.041    | 0.027 ± 0.017    |
| <i>Bradyidius pacificus</i>         | L             | -                      | 2.00 | 1          | 0.30  | 0.132                       | 0.132     | 0.000 ± 0.000     | 0.180                      | 0.180    | 0.001 ± 0.001    |
| <i>Calanus glacialis+marshallae</i> | M             | -                      | 2.00 | 215        | 65.55 | 0.244                       | 1641.060  | 63.787 ± 8.891    | 0.111                      | 743.400  | 28.927 ± 4.027   |
| <i>Calanus glacialis+marshallae</i> | L             | -                      | 2.00 | 290        | 88.41 | 0.125                       | 990.842   | 55.376 ± 5.801    | 0.350                      | 2695.090 | 144.323 ± 15.075 |
| <i>Calanus pacificus</i>            | M             | -                      | 2.00 | 1          | 0.30  | 0.600                       | 0.600     | 0.002 ± 0.002     | 0.300                      | 0.300    | 0.001 ± 0.001    |
| Caridea gen. sp.                    | L             | larvae                 | 2.00 | 26         | 7.93  | 0.012                       | 4.029     | 0.061 ± 0.019     | 0.036                      | 12.180   | 0.183 ± 0.059    |
| <i>Centropages abdominalis</i>      | S             | -                      | 1.50 | 69         | 21.04 | 0.167                       | 1350.000  | 20.717 ± 5.656    | 0.010                      | 81.000   | 1.098 ± 0.314    |
| <i>Centropages abdominalis</i>      | M             | -                      | 2.00 | 86         | 26.22 | 0.440                       | 1266.667  | 21.073 ± 5.484    | 0.066                      | 190.000  | 3.161 ± 0.823    |
| <i>Chiridius sp.</i>                | L             | -                      | 2.00 | 6          | 1.83  | 0.625                       | 9.756     | 0.051 ± 0.031     | 1.500                      | 23.415   | 0.122 ± 0.076    |
| <i>Clione limacina</i>              | S             | -                      | 1.00 | 35         | 10.67 | 0.167                       | 138.889   | 2.291 ± 0.559     | 0.007                      | 5.556    | 0.092 ± 0.022    |
| <i>Clione limacina</i>              | M             | -                      | 2.00 | 46         | 14.02 | 0.111                       | 7.356     | 0.196 ± 0.038     | 0.100                      | 6.363    | 0.170 ± 0.033    |
| <i>Clione limacina</i>              | L             | -                      | 2.00 | 89         | 27.13 | 0.004                       | 6.457     | 0.068 ± 0.023     | 0.200                      | 322.850  | 3.379 ± 1.126    |
| Copepoda gen. sp.                   | S             | -                      | 1.50 | 5          | 1.52  | 46.875                      | 81.522    | 1.061 ± 0.482     | 2.344                      | 4.076    | 0.053 ± 0.024    |
| Copepoda gen. sp.                   | S             | nauplius               | 1.00 | 246        | 75.00 | 0.667                       | 1813.333  | 212.836 ± 18.737  | 0.010                      | 27.200   | 2.900 ± 0.252    |
| Copepoda gen. sp.                   | S             | ova                    | 1.00 | 21         | 6.40  | 12.500                      | 450.000   | 6.352 ± 2.175     | 0.050                      | 1.800    | 0.025 ± 0.009    |
| Cumacea gen. sp.                    | M             | -                      | 1.00 | 12         | 3.66  | 0.500                       | 9.091     | 0.131 ± 0.049     | 0.292                      | 5.318    | 0.077 ± 0.029    |
| Cumacea gen. sp.                    | L             | -                      | 2.00 | 18         | 5.49  | 0.020                       | 80.969    | 0.514 ± 0.284     | 0.371                      | 1502.293 | 9.542 ± 5.263    |
| <i>Dimophyes arctica</i>            | L             | -                      | 1.00 | 15         | 4.57  | 0.033                       | 0.733     | 0.010 ± 0.003     | 0.300                      | 6.600    | 0.086 ± 0.029    |
| Echinodermata gen. sp.              | S             | larvae                 | 1.00 | 31         | 9.45  | 0.667                       | 226.667   | 2.799 ± 0.962     | 0.005                      | 1.813    | 0.022 ± 0.008    |
| Echinodermata gen. sp.              | M             | larvae                 | 1.00 | 2          | 0.61  | 2.778                       | 3.000     | 0.018 ± 0.012     | 0.500                      | 0.540    | 0.003 ± 0.002    |
| <i>Epilabidocera amphitrites</i>    | L             | -                      | 2.00 | 1          | 0.30  | 0.208                       | 0.208     | 0.001 ± 0.001     | 0.417                      | 0.417    | 0.001 ± 0.001    |
| <i>Eucalanus bungii</i>             | S             | -                      | 1.50 | 13         | 3.96  | 2.857                       | 614.286   | 5.058 ± 2.274     | 0.200                      | 43.000   | 0.406 ± 0.172    |
| <i>Eucalanus bungii</i>             | M             | -                      | 2.00 | 177        | 53.96 | 0.170                       | 400.000   | 29.141 ± 3.511    | 0.341                      | 800.000  | 58.283 ± 7.022   |

|                                        |   |            |      |     |       |        |           |                   |         |          |                  |
|----------------------------------------|---|------------|------|-----|-------|--------|-----------|-------------------|---------|----------|------------------|
| <i>Eucalanus bungii</i>                | L | -          | 2.00 | 266 | 81.10 | 0.014  | 424.873   | 18.592 ± 2.358    | 0.100   | 3229.035 | 135.112 ± 17.508 |
| <i>Euphausia</i> gen. sp.              | L | furcilia   | 2.00 | 70  | 21.34 | 0.031  | 34.945    | 1.088 ± 0.214     | 0.093   | 104.835  | 3.180 ± 0.627    |
| <i>Euphausia pacifica</i>              | L | -          | 10.0 | 1   | 0.30  | 4.000  | 4.000     | 0.012 ± 0.012     | 140.000 | 140.000  | 0.427 ± 0.427    |
| <i>Euphausiacea</i> gen. sp.           | S | calyptopis | 1.00 | 5   | 1.52  | 14.747 | 121.250   | 1.070 ± 0.550     | 1.180   | 9.700    | 0.086 ± 0.044    |
| <i>Euphausiacea</i> gen. sp.           | S | nauplius   | 1.00 | 15  | 4.57  | 6.750  | 720.000   | 6.751 ± 2.884     | 0.270   | 28.800   | 0.273 ± 0.116    |
| <i>Euphausiacea</i> gen. sp.           | S | ova        | 1.00 | 5   | 1.52  | 0.667  | 2343.333  | 7.646 ± 7.168     | 0.020   | 70.300   | 0.229 ± 0.215    |
| <i>Euphausiacea</i> gen. sp.           | M | calyptopis | 2.00 | 44  | 13.41 | 0.029  | 54.479    | 0.869 ± 0.249     | 0.012   | 22.500   | 0.359 ± 0.103    |
| <i>Euphausiacea</i> gen. sp.           | M | furcilia   | 2.00 | 18  | 5.49  | 0.030  | 5.250     | 0.067 ± 0.026     | 0.054   | 9.450    | 0.121 ± 0.046    |
| <i>Euphausiacea</i> gen. sp.           | M | juvenis    | 2.00 | 19  | 5.79  | 2.059  | 166.667   | 3.390 ± 1.040     | 3.706   | 300.000  | 6.102 ± 1.872    |
| <i>Eurytemora herdmani</i>             | S | -          | 1.50 | 1   | 0.30  | 17.241 | 17.241    | 0.053 ± 0.053     | 0.414   | 0.414    | 0.001 ± 0.001    |
| <i>Eurytemora herdmani</i>             | M | -          | 2.00 | 1   | 0.30  | 0.100  | 0.100     | 0.000 ± 0.000     | 0.006   | 0.006    | 0.000 ± 0.000    |
| <i>Fritillaria</i> sp.                 | S | -          | 1.00 | 41  | 12.50 | 0.769  | 576.923   | 13.541 ± 2.943    | 0.013   | 9.808    | 0.235 ± 0.050    |
| <i>Gaetanus simplex</i>                | L | -          | 2.00 | 1   | 0.30  | 0.604  | 0.604     | 0.002 ± 0.002     | 1.389   | 1.389    | 0.004 ± 0.004    |
| <i>Gaetanus</i> sp.                    | L | -          | 2.00 | 1   | 0.30  | 0.183  | 0.183     | 0.001 ± 0.001     | 0.421   | 0.421    | 0.001 ± 0.001    |
| <i>Gaidius variabilis</i>              | M | -          | 2.00 | 1   | 0.30  | 0.732  | 0.732     | 0.002 ± 0.002     | 0.779   | 0.779    | 0.002 ± 0.002    |
| Gammaridae gen. sp.                    | M | -          | 1.50 | 3   | 0.91  | 0.200  | 3.400     | 0.016 ± 0.011     | 0.100   | 1.700    | 0.008 ± 0.006    |
| Gammaridae gen. sp.                    | L | -          | 2.00 | 56  | 17.07 | 0.012  | 75.406    | 0.676 ± 0.265     | 0.120   | 754.060  | 6.755 ± 2.651    |
| <i>Globigerina</i> sp.                 | S | -          | 1.00 | 31  | 9.45  | 6.250  | 800.000   | 10.558 ± 3.186    | 0.050   | 6.400    | 0.084 ± 0.025    |
| <i>Hyperia galba</i>                   | L | -          | 3.00 | 1   | 0.30  | 0.038  | 0.038     | 0.000 ± 0.000     | 0.939   | 0.939    | 0.003 ± 0.003    |
| <i>Hyperia medusarum</i>               | L | -          | 3.00 | 3   | 0.91  | 0.008  | 0.838     | 0.003 ± 0.003     | 0.300   | 33.500   | 0.105 ± 0.102    |
| <i>Limacina helicina</i>               | S | -          | 1.00 | 135 | 41.16 | 0.667  | 16933.332 | 279.655 ± 74.138  | 0.010   | 254.000  | 4.195 ± 1.112    |
| <i>Limacina helicina</i>               | M | -          | 1.00 | 110 | 33.54 | 0.056  | 1758.000  | 22.124 ± 7.048    | 0.027   | 838.566  | 10.551 ± 3.362   |
| <i>Limacina helicina</i>               | L | -          | 1.00 | 71  | 21.65 | 0.060  | 32.160    | 0.590 ± 0.161     | 0.223   | 119.603  | 2.193 ± 0.599    |
| <i>Metridia pacifica</i>               | M | -          | 2.00 | 232 | 70.73 | 0.115  | 783.284   | 51.684 ± 5.859    | 0.078   | 529.500  | 34.927 ± 3.961   |
| <i>Metridia pacifica</i>               | L | -          | 2.00 | 187 | 57.01 | 0.216  | 505.556   | 9.737 ± 1.990     | 0.188   | 455.000  | 8.781 ± 1.796    |
| <i>Metridia</i> sp.                    | S | copepodit  | 1.50 | 180 | 54.88 | 0.250  | 3455.056  | 133.104 ± 16.480  | 0.010   | 134.747  | 5.233 ± 0.645    |
| <i>Metridia</i> sp.                    | M | copepodit  | 2.00 | 79  | 24.09 | 0.734  | 1018.537  | 35.497 ± 6.540    | 0.220   | 305.561  | 10.649 ± 1.962   |
| <i>Microcalanus pygmaeus</i>           | S | -          | 1.50 | 199 | 60.67 | 1.000  | 1790.000  | 94.931 ± 10.832   | 0.014   | 25.060   | 1.329 ± 0.152    |
| <i>Microsetella</i> sp.                | S | -          | 1.50 | 81  | 24.70 | 0.588  | 270.588   | 11.836 ± 1.860    | 0.010   | 4.600    | 0.216 ± 0.033    |
| <i>Mysida</i> gen.sp.                  | M | larvae     | 1.00 | 5   | 1.52  | 0.480  | 17.647    | 0.067 ± 0.054     | 0.082   | 3.000    | 0.011 ± 0.009    |
| <i>Mysida</i> gen.sp.                  | L | -          | 2.00 | 6   | 1.83  | 0.294  | 3.895     | 0.019 ± 0.012     | 17.544  | 233.700  | 1.163 ± 0.746    |
| <i>Mysida</i> gen.sp.                  | L | <10 mm     | 2.00 | 9   | 2.74  | 0.230  | 0.941     | 0.010 ± 0.004     | 0.532   | 2.178    | 0.024 ± 0.009    |
| <i>Neocalanus cristatus</i>            | M | -          | 2.00 | 1   | 0.30  | 10.500 | 10.500    | 0.032 ± 0.032     | 4.200   | 4.200    | 0.013 ± 0.013    |
| <i>Neocalanus cristatus</i>            | L | -          | 2.00 | 160 | 48.78 | 0.010  | 99.210    | 3.353 ± 0.508     | 0.100   | 992.100  | 30.115 ± 4.680   |
| <i>Neocalanus plumchrus+flemingeri</i> | M | -          | 2.00 | 51  | 15.55 | 1.143  | 236.000   | 5.289 ± 1.134     | 0.400   | 82.600   | 1.870 ± 0.400    |
| <i>Neocalanus plumchrus+flemingeri</i> | L | -          | 2.00 | 277 | 84.45 | 0.120  | 513.840   | 28.815 ± 3.278    | 0.300   | 1284.600 | 73.490 ± 8.228   |
| <i>Neocalanus</i> sp.                  | S | copepodit  | 1.50 | 51  | 15.55 | 8.427  | 975.000   | 15.402 ± 3.943    | 0.312   | 36.075   | 0.575 ± 0.147    |
| <i>Neocalanus</i> sp.                  | M | copepodit  | 2.00 | 48  | 14.63 | 0.217  | 80.000    | 1.121 ± 0.317     | 0.076   | 28.080   | 0.393 ± 0.111    |
| <i>Oikopleura vanhoeffeni</i>          | S | -          | 1.00 | 22  | 6.71  | 0.217  | 156.522   | 1.982 ± 0.660     | 0.007   | 5.322    | 0.067 ± 0.022    |
| <i>Oikopleura vanhoeffeni</i>          | M | -          | 1.00 | 51  | 15.55 | 0.412  | 392.000   | 10.813 ± 2.633    | 0.036   | 34.104   | 0.943 ± 0.229    |
| <i>Oikopleura vanhoeffeni</i>          | L | -          | 2.00 | 67  | 20.43 | 0.078  | 33.333    | 0.803 ± 0.181     | 0.156   | 66.666   | 1.607 ± 0.362    |
| <i>Oithona similis</i>                 | S | -          | 1.50 | 300 | 91.46 | 14.286 | 8792.857  | 1911.194 ± 93.696 | 0.200   | 123.100  | 27.374 ± 1.328   |
| Ostracoda gen. sp.                     | S | -          | 1.00 | 1   | 0.30  | 18.000 | 18.000    | 0.055 ± 0.055     | 1.746   | 1.746    | 0.005 ± 0.005    |
| Ostracoda gen. sp.                     | M | -          | 1.00 | 10  | 3.05  | 0.111  | 6.242     | 0.062 ± 0.028     | 0.046   | 2.603    | 0.026 ± 0.012    |

|                                 |   |           |      |     |       |        |           |                  |        |          |                  |
|---------------------------------|---|-----------|------|-----|-------|--------|-----------|------------------|--------|----------|------------------|
| Ostracoda gen. sp.              | L | -         | 1.00 | 16  | 4.88  | 0.045  | 0.339     | 0.008 ± 0.002    | 0.066  | 0.500    | 0.012 ± 0.003    |
| Paguridae gen. sp.              | L | larvae    | 2.00 | 36  | 10.98 | 0.028  | 28.490    | 0.247 ± 0.116    | 0.100  | 100.000  | 0.866 ± 0.406    |
| <i>Paraeuchaeta elongata</i>    | L | -         | 2.00 | 9   | 2.74  | 0.133  | 0.702     | 0.008 ± 0.003    | 0.559  | 2.947    | 0.032 ± 0.013    |
| <i>Parasagitta elegans</i>      | S | -         | 1.00 | 11  | 3.35  | 9.184  | 122.857   | 1.340 ± 0.553    | 0.643  | 8.600    | 0.094 ± 0.039    |
| <i>Parasagitta elegans</i>      | M | -         | 2.00 | 129 | 39.33 | 0.258  | 245.000   | 7.958 ± 1.364    | 0.046  | 49.000   | 1.545 ± 0.268    |
| <i>Parasagitta elegans</i>      | L | -         | 10.0 | 189 | 57.62 | 0.073  | 87.273    | 11.065 ± 0.925   | 1.600  | 1920.000 | 239.874 ± 20.075 |
| <i>Parasagitta elegans</i>      | L | <10 mm    | 2.00 | 78  | 23.78 | 0.075  | 31.000    | 1.116 ± 0.200    | 0.060  | 24.800   | 0.897 ± 0.162    |
| <i>Parasagitta elegans</i>      | L | 10-20 mm  | 5.00 | 177 | 53.96 | 0.180  | 71.094    | 7.692 ± 0.653    | 0.900  | 370.256  | 39.592 ± 3.370   |
| <i>Parasagitta elegans</i>      | L | 20-25 mm  | 10.0 | 118 | 35.98 | 0.759  | 85.920    | 3.069 ± 0.414    | 13.893 | 1606.700 | 51.124 ± 7.154   |
| <i>Parasagitta elegans</i>      | L | 25-30 mm  | 10.0 | 32  | 9.76  | 0.755  | 10.390    | 0.341 ± 0.070    | 25.000 | 363.299  | 11.259 ± 2.394   |
| <i>Parasagitta elegans</i>      | L | >30 mm    | 10.0 | 11  | 3.35  | 0.833  | 4.301     | 0.065 ± 0.022    | 43.667 | 223.656  | 3.339 ± 1.159    |
| <i>Pareuchaeta sp.</i>          | M | copepodit | 2.00 | 1   | 0.30  | 17.544 | 17.544    | 0.053 ± 0.054    | 12.912 | 12.912   | 0.039 ± 0.039    |
| <i>Podon leuckartii</i>         | S | -         | 1.00 | 2   | 0.61  | 27.778 | 94.444    | 0.373 ± 0.300    | 0.750  | 2.550    | 0.010 ± 0.008    |
| Polychaeta gen. sp.             | S | larvae    | 1.00 | 58  | 17.68 | 0.067  | 7837.500  | 157.453 ± 39.576 | 0.002  | 219.450  | 4.255 ± 1.072    |
| Polychaeta gen. sp.             | M | larvae    | 1.00 | 28  | 8.54  | 0.333  | 26.947    | 0.645 ± 0.169    | 0.297  | 24.037   | 0.575 ± 0.151    |
| Polychaeta gen. sp.             | L | larvae    | 2.00 | 7   | 2.13  | 0.040  | 0.720     | 0.006 ± 0.003    | 0.060  | 1.080    | 0.010 ± 0.004    |
| <i>Primno macropa</i>           | L | -         | 3.00 | 1   | 0.30  | 2.059  | 2.059     | 0.006 ± 0.006    | 34.257 | 34.257   | 0.104 ± 0.105    |
| <i>Primno macropa</i>           | L | <5 mm     | 2.00 | 1   | 0.30  | 0.784  | 0.784     | 0.002 ± 0.002    | 1.725  | 1.725    | 0.005 ± 0.005    |
| <i>Primno macropa</i>           | L | 5-7 mm    | 3.00 | 1   | 0.30  | 0.294  | 0.294     | 0.001 ± 0.001    | 1.985  | 1.985    | 0.006 ± 0.006    |
| <i>Primno macropa</i>           | L | >10 mm    | 3.00 | 1   | 0.30  | 0.980  | 0.980     | 0.003 ± 0.003    | 39.333 | 39.333   | 0.120 ± 0.120    |
| <i>Pseudocalanus minutus</i>    | M | -         | 2.00 | 204 | 62.20 | 1.400  | 1895.833  | 114.609 ± 13.716 | 0.176  | 227.500  | 13.912 ± 1.664   |
| <i>Pseudocalanus newmani</i>    | S | -         | 1.50 | 109 | 33.23 | 4.444  | 1976.087  | 132.165 ± 16.600 | 0.178  | 79.043   | 5.287 ± 0.664    |
| Pseudocalanus sp.               | S | -         | 1.50 | 204 | 62.20 | 3.333  | 16421.053 | 507.324 ± 65.868 | 0.133  | 656.842  | 20.293 ± 2.635   |
| Pseudocalanus sp.               | M | -         | 2.00 | 118 | 35.98 | 1.667  | 937.500   | 39.143 ± 5.195   | 0.150  | 84.375   | 3.523 ± 0.468    |
| <i>Racovitzanus antarcticus</i> | M | -         | 2.00 | 7   | 2.13  | 0.467  | 17.544    | 0.067 ± 0.054    | 0.137  | 4.912    | 0.019 ± 0.015    |
| Radiolaria gen. sp.             | S | -         | 1.00 | 1   | 0.30  | 37.190 | 37.190    | 0.113 ± 0.114    | 0.372  | 0.372    | 0.001 ± 0.001    |
| <i>Scolecithricella minor</i>   | S | -         | 1.50 | 13  | 3.96  | 0.125  | 41.005    | 0.502 ± 0.198    | 0.010  | 3.280    | 0.040 ± 0.016    |
| <i>Scolecithricella minor</i>   | M | -         | 2.00 | 70  | 21.34 | 0.063  | 135.417   | 2.299 ± 0.710    | 0.010  | 21.667   | 0.375 ± 0.114    |
| <i>Themisto libellula</i>       | L | -         | 5.00 | 48  | 14.63 | 0.020  | 6.771     | 0.171 ± 0.040    | 1.500  | 504.515  | 12.794 ± 3.024   |
| <i>Themisto libellula</i>       | L | 5-10 mm   | 3.00 | 60  | 18.29 | 0.183  | 6.771     | 0.196 ± 0.037    | 2.569  | 94.792   | 2.748 ± 0.523    |
| <i>Themisto libellula</i>       | L | 10-20 mm  | 5.00 | 31  | 9.45  | 0.459  | 17.500    | 0.321 ± 0.091    | 46.818 | 1785.000 | 32.555 ± 9.307   |
| <i>Themisto libellula</i>       | L | 20-30 mm  | 5.00 | 9   | 2.74  | 0.151  | 3.520     | 0.025 ± 0.012    | 45.300 | 1056.000 | 7.564 ± 3.744    |
| <i>Themisto pacifica</i>        | S | -         | 1.00 | 16  | 4.88  | 1.000  | 41.304    | 0.507 ± 0.190    | 0.138  | 5.700    | 0.070 ± 0.026    |
| <i>Themisto pacifica</i>        | M | -         | 2.00 | 59  | 17.99 | 0.040  | 58.030    | 1.020 ± 0.253    | 0.026  | 38.300   | 0.673 ± 0.167    |
| <i>Themisto pacifica</i>        | L | -         | 3.00 | 138 | 42.07 | 0.015  | 7.985     | 0.537 ± 0.066    | 0.200  | 103.800  | 6.825 ± 0.841    |
| <i>Themisto pacifica</i>        | L | <5 mm     | 2.00 | 107 | 32.62 | 0.136  | 11.067    | 0.345 ± 0.052    | 0.226  | 16.600   | 0.551 ± 0.082    |
| <i>Themisto pacifica</i>        | L | 5-7 mm    | 3.00 | 18  | 5.49  | 0.275  | 4.945     | 0.083 ± 0.026    | 1.624  | 29.176   | 0.501 ± 0.157    |
| <i>Themisto pacifica</i>        | L | 7-10 mm   | 3.00 | 12  | 3.66  | 0.060  | 1.630     | 0.019 ± 0.007    | 0.900  | 23.478   | 0.278 ± 0.105    |
| <i>Themisto pacifica</i>        | L | >10 mm    | 3.00 | 1   | 0.30  | 0.455  | 0.455     | 0.001 ± 0.001    | 13.509 | 13.509   | 0.041 ± 0.041    |
| <i>Thysanoessa inermis</i>      | L | -         | 10.0 | 74  | 22.56 | 0.006  | 70.862    | 0.843 ± 0.271    | 0.330  | 4606.000 | 53.921 ± 17.567  |
| <i>Thysanoessa inermis</i>      | L | <10 mm    | 3.00 | 28  | 8.54  | 0.027  | 36.390    | 0.536 ± 0.187    | 0.080  | 109.170  | 1.609 ± 0.560    |
| <i>Thysanoessa inermis</i>      | L | 10-20 mm  | 5.00 | 20  | 6.10  | 0.131  | 10.784    | 0.103 ± 0.041    | 3.668  | 301.952  | 2.813 ± 1.127    |
| <i>Thysanoessa inermis</i>      | L | 20-25 mm  | 10.0 | 5   | 1.52  | 0.980  | 12.222    | 0.073 ± 0.043    | 75.176 | 977.760  | 5.829 ± 3.407    |
| <i>Thysanoessa inspinata</i>    | L | -         | 5.00 | 8   | 2.44  | 0.042  | 1.300     | 0.011 ± 0.005    | 1.406  | 43.500   | 0.358 ± 0.165    |

|                                                         |   |          |      |     |       |       |          |                    |         |          |                   |
|---------------------------------------------------------|---|----------|------|-----|-------|-------|----------|--------------------|---------|----------|-------------------|
| <i>Thysanoessa longipes</i>                             | L | -        | 5.00 | 34  | 10.37 | 0.005 | 1.875    | 0.041 ± 0.011      | 0.400   | 159.400  | 3.342 ± 0.879     |
| <i>Thysanoessa longipes</i>                             | L | <10 mm   | 3.00 | 38  | 11.59 | 0.150 | 9.375    | 0.117 ± 0.037      | 0.600   | 37.500   | 0.469 ± 0.147     |
| <i>Thysanoessa longipes</i>                             | L | 10-20 mm | 5.00 | 11  | 3.35  | 0.102 | 3.333    | 0.032 ± 0.013      | 2.586   | 84.512   | 0.805 ± 0.333     |
| <i>Thysanoessa longipes</i>                             | L | 20-25 mm | 10.0 | 1   | 0.30  | 4.197 | 4.197    | 0.013 ± 0.013      | 318.980 | 318.980  | 0.972 ± 0.974     |
| <i>Thysanoessa longipes</i>                             | L | >25 mm   | 10.0 | 1   | 0.30  | 0.758 | 0.758    | 0.002 ± 0.002      | 106.122 | 106.122  | 0.324 ± 0.324     |
| <i>Thysanoessa raschii</i>                              | L | -        | 10.0 | 97  | 29.57 | 0.006 | 48.686   | 1.136 ± 0.258      | 0.400   | 3408.000 | 85.867 ± 19.303   |
| <i>Thysanoessa raschii</i>                              | L | <10 mm   | 3.00 | 81  | 24.70 | 0.040 | 43.171   | 0.949 ± 0.216      | 0.140   | 151.100  | 3.465 ± 0.782     |
| <i>Thysanoessa raschii</i>                              | L | 10-20 mm | 5.00 | 32  | 9.76  | 0.407 | 12.727   | 0.206 ± 0.057      | 10.175  | 318.175  | 5.258 ± 1.437     |
| <i>Thysanoessa raschii</i>                              | L | 20-25 mm | 10.0 | 30  | 9.15  | 0.860 | 9.836    | 0.229 ± 0.052      | 66.239  | 640.082  | 16.330 ± 3.612    |
| <i>Tomopteris sp.</i>                                   | L | -        | 2.00 | 1   | 0.30  | 0.186 | 0.186    | 0.001 ± 0.001      | 1.860   | 1.860    | 0.006 ± 0.006     |
| <i>Triconia borealis</i>                                | S | -        | 1.50 | 148 | 45.12 | 0.200 | 1222.222 | 51.930 ± 7.939     | 0.007   | 36.667   | 1.629 ± 0.242     |
| Amphipods                                               |   |          |      |     |       |       |          | 3.933 ± 0.436      |         |          | 71.709 ± 10.858   |
| Copepods                                                |   |          |      |     |       |       |          | 3616.679 ± 123.055 |         |          | 618.297 ± 27.102  |
| Cladocerans                                             |   |          |      |     |       |       |          | 0.373 ± 0.300      |         |          | 0.010 ± 0.008     |
| Gelatinous (jellyfish. comb jellies. pelagic tunicates) |   |          |      |     |       |       |          | 27.368 ± 4.008     |         |          | 18.789 ± 3.142    |
| Pteropods                                               |   |          |      |     |       |       |          | 304.924 ± 74.475   |         |          | 20.579 ± 3.764    |
| Cumaceans                                               |   |          |      |     |       |       |          | 0.645 ± 0.288      |         |          | 9.619 ± 5.264     |
| Meroplankton (larvae of benthic animals)                |   |          |      |     |       |       |          | 640.752 ± 211.028  |         |          | 17.475 ± 2.897    |
| Mysids                                                  |   |          |      |     |       |       |          | 0.097 ± 0.056      |         |          | 1.198 ± 0.746     |
| Protozoa                                                |   |          |      |     |       |       |          | 10.671 ± 3.188     |         |          | 0.086 ± 0.026     |
| Other groups                                            |   |          |      |     |       |       |          | 0.001 ± 0.001      |         |          | 0.006 ± 0.006     |
| Ostracods                                               |   |          |      |     |       |       |          | 0.125 ± 0.062      |         |          | 0.044 ± 0.013     |
| Chaetognaths                                            |   |          |      |     |       |       |          | 32.645 ± 1.915     |         |          | 347.722 ± 21.742  |
| Euphausiids                                             |   |          |      |     |       |       |          | 25.183 ± 7.838     |         |          | 192.140 ± 26.763  |
| Entire zooplankton                                      |   |          |      |     |       |       |          | 4663.396 ± 255.565 |         |          | 1297.674 ± 45.849 |

**Table 6** from Volkov AF. Volvenko IV (2016a) Net Zooplankton of the Western Part of the Bering Sea: Occurrence, Abundance, and Biomass. 1986-2013. TINRO-Center, Vladivostok

The abundance of zooplankton in epipelagial regardless of season and time of day. Averaging data over the entire observation period. Region No. 4 (191 stations)

| Species<br>or taxonomic group       | Frac-<br>tion | Stage or<br>size group | C.E. | Occurrence |       | Number. ind./m <sup>3</sup> |          |                  | Biomass. mg/m <sup>3</sup> |          |                  |
|-------------------------------------|---------------|------------------------|------|------------|-------|-----------------------------|----------|------------------|----------------------------|----------|------------------|
|                                     |               |                        |      | samples    | %     | Min                         | Max      | Average          | Min                        | Max      | Average          |
| <i>Acartia longiremis</i>           | S             | -                      | 1.50 | 60         | 31.41 | 0.250                       | 621.951  | 23.490 ± 5.187   | 0.013                      | 31.098   | 1.137 ± 0.253    |
| <i>Acartia longiremis</i>           | M             | -                      | 2.00 | 17         | 8.90  | 0.400                       | 5.000    | 0.183 ± 0.052    | 0.065                      | 0.810    | 0.030 ± 0.008    |
| <i>Aglantha digitale</i>            | M             | -                      | 1.00 | 15         | 7.85  | 0.100                       | 50.000   | 0.632 ± 0.298    | 0.132                      | 65.850   | 0.832 ± 0.392    |
| <i>Aglantha digitale</i>            | L             | -                      | 1.00 | 71         | 37.17 | 0.001                       | 4.691    | 0.097 ± 0.028    | 0.100                      | 703.704  | 14.651 ± 4.131   |
| <i>Balanus sp.</i>                  | S             | cypris                 | 1.00 | 1          | 0.52  | 776.000                     | 776.000  | 4.063 ± 4.074    | 38.800                     | 38.800   | 0.203 ± 0.204    |
| <i>Balanus sp.</i>                  | S             | nauplius               | 1.00 | 13         | 6.81  | 17.241                      | 150.000  | 3.687 ± 1.227    | 0.241                      | 2.400    | 0.056 ± 0.019    |
| <i>Balanus sp.</i>                  | M             | cypris                 | 1.00 | 2          | 1.05  | 0.952                       | 15.873   | 0.088 ± 0.083    | 0.216                      | 3.603    | 0.020 ± 0.019    |
| <i>Balanus sp.</i>                  | M             | nauplius               | 1.00 | 16         | 8.38  | 0.233                       | 84.211   | 1.131 ± 0.577    | 0.027                      | 9.600    | 0.129 ± 0.066    |
| <i>Beroe cucumis</i>                | L             | -                      | 1.00 | 3          | 1.57  | 0.051                       | 0.130    | 0.001 ± 0.001    | 9.383                      | 23.917   | 0.246 ± 0.152    |
| Bivalvia gen. sp.                   | S             | larvae                 | 1.00 | 63         | 32.98 | 1.000                       | 3750.000 | 146.594 ± 30.291 | 0.008                      | 30.000   | 1.173 ± 0.242    |
| Brachyura+Lithodidae gen. sp.       | L             | larvae                 | 2.00 | 52         | 27.23 | 0.013                       | 15.181   | 0.342 ± 0.108    | 0.100                      | 118.000  | 2.655 ± 0.843    |
| <i>Calanus glacialis+marshallae</i> | M             | -                      | 2.00 | 163        | 85.34 | 0.182                       | 2412.583 | 94.004 ± 17.385  | 0.082                      | 1092.900 | 42.635 ± 7.875   |
| <i>Calanus glacialis+marshallae</i> | L             | -                      | 2.00 | 177        | 92.67 | 0.331                       | 433.321  | 64.231 ± 5.965   | 0.900                      | 1213.300 | 168.591 ± 15.890 |
| <i>Calanus pacificus</i>            | M             | -                      | 2.00 | 1          | 0.52  | 0.200                       | 0.200    | 0.001 ± 0.001    | 0.100                      | 0.100    | 0.001 ± 0.001    |
| Caridea gen. sp.                    | L             | larvae                 | 2.00 | 15         | 7.85  | 0.014                       | 2.000    | 0.031 ± 0.013    | 0.042                      | 6.046    | 0.093 ± 0.039    |
| <i>Centropages abdominalis</i>      | S             | -                      | 1.50 | 33         | 17.28 | 1.667                       | 562.500  | 11.599 ± 3.683   | 0.100                      | 28.125   | 0.590 ± 0.185    |
| <i>Centropages abdominalis</i>      | M             | -                      | 2.00 | 45         | 23.56 | 0.500                       | 2909.500 | 17.438 ± 15.270  | 0.075                      | 436.425  | 2.616 ± 2.291    |
| <i>Chiridius sp.</i>                | L             | -                      | 2.00 | 4          | 2.09  | 0.649                       | 6.098    | 0.043 ± 0.033    | 1.558                      | 14.634   | 0.104 ± 0.078    |
| <i>Clione limacina</i>              | S             | -                      | 1.00 | 15         | 7.85  | 0.167                       | 49.180   | 1.822 ± 0.530    | 0.007                      | 1.967    | 0.073 ± 0.021    |
| <i>Clione limacina</i>              | M             | -                      | 2.00 | 25         | 13.09 | 0.111                       | 8.000    | 0.255 ± 0.071    | 0.100                      | 6.920    | 0.221 ± 0.061    |
| <i>Clione limacina</i>              | L             | -                      | 2.00 | 51         | 26.70 | 0.000                       | 0.649    | 0.036 ± 0.007    | 0.010                      | 32.468   | 1.786 ± 0.337    |
| Copepoda gen. sp.                   | S             | -                      | 1.50 | 2          | 1.05  | 53.571                      | 119.318  | 0.905 ± 0.685    | 2.679                      | 5.966    | 0.045 ± 0.034    |
| Copepoda gen. sp.                   | S             | nauplius               | 1.00 | 128        | 67.02 | 0.667                       | 2922.078 | 263.467 ± 31.759 | 0.010                      | 37.987   | 3.566 ± 0.426    |
| Copepoda gen. sp.                   | S             | ova                    | 1.00 | 15         | 7.85  | 2.500                       | 625.000  | 8.537 ± 3.721    | 0.010                      | 2.500    | 0.034 ± 0.015    |
| Cumacea gen. sp.                    | M             | -                      | 1.00 | 2          | 1.05  | 0.976                       | 1.905    | 0.015 ± 0.011    | 0.571                      | 1.114    | 0.009 ± 0.007    |
| Cumacea gen. sp.                    | L             | -                      | 2.00 | 7          | 3.66  | 0.060                       | 78.223   | 1.093 ± 0.532    | 1.113                      | 1451.356 | 20.279 ± 9.879   |
| <i>Dimophyes arctica</i>            | L             | -                      | 1.00 | 1          | 0.52  | 0.067                       | 0.067    | 0.000 ± 0.000    | 0.600                      | 0.600    | 0.003 ± 0.003    |
| Echinodermata gen. sp.              | S             | larvae                 | 1.00 | 8          | 4.19  | 2.000                       | 52.941   | 0.984 ± 0.403    | 0.016                      | 0.424    | 0.008 ± 0.003    |
| Echinodermata gen. sp.              | M             | larvae                 | 1.00 | 1          | 0.52  | 1.111                       | 1.111    | 0.006 ± 0.006    | 0.200                      | 0.200    | 0.001 ± 0.001    |
| <i>Eucalanus bungii</i>             | S             | -                      | 1.50 | 8          | 4.19  | 27.108                      | 642.857  | 6.567 ± 3.719    | 2.358                      | 55.929   | 0.567 ± 0.323    |
| <i>Eucalanus bungii</i>             | M             | -                      | 2.00 | 72         | 37.70 | 0.200                       | 506.600  | 19.393 ± 4.671   | 0.400                      | 1013.200 | 38.786 ± 9.342   |
| <i>Eucalanus bungii</i>             | L             | -                      | 2.00 | 116        | 60.73 | 0.014                       | 262.882  | 10.916 ± 1.973   | 0.100                      | 1997.904 | 79.765 ± 14.625  |
| Euphausia gen. sp.                  | L             | furcilia               | 2.00 | 47         | 24.61 | 0.035                       | 64.900   | 2.084 ± 0.527    | 0.105                      | 194.700  | 6.064 ± 1.546    |
| <i>Euphausia pacifica</i>           | L             | -                      | 10.0 | 1          | 0.52  | 0.200                       | 0.200    | 0.001 ± 0.001    | 7.000                      | 7.000    | 0.037 ± 0.037    |
| Euphausiacea gen. sp.               | S             | calyptopis             | 1.00 | 1          | 0.52  | 50.000                      | 50.000   | 0.262 ± 0.262    | 4.000                      | 4.000    | 0.021 ± 0.021    |
| Euphausiacea gen. sp.               | S             | nauplius               | 1.00 | 6          | 3.14  | 13.393                      | 500.000  | 4.652 ± 2.924    | 0.536                      | 20.000   | 0.189 ± 0.118    |
| Euphausiacea gen. sp.               | M             | calyptopis             | 2.00 | 31         | 16.23 | 0.247                       | 110.169  | 1.612 ± 0.648    | 0.102                      | 45.500   | 0.666 ± 0.268    |
| Euphausiacea gen. sp.               | M             | furcilia               | 2.00 | 8          | 4.19  | 0.125                       | 2.404    | 0.061 ± 0.025    | 0.225                      | 4.327    | 0.110 ± 0.046    |
| Euphausiacea gen. sp.               | M             | juvenis                | 2.00 | 8          | 4.19  | 12.500                      | 107.143  | 1.977 ± 0.852    | 22.500                     | 192.857  | 3.559 ± 1.534    |

|                                        |   |           |      |     |       |        |           |                    |        |          |                  |
|----------------------------------------|---|-----------|------|-----|-------|--------|-----------|--------------------|--------|----------|------------------|
| <i>Eurytemora herdmani</i>             | M | -         | 2.00 | 1   | 0.52  | 1.600  | 1.600     | 0.008 ± 0.008      | 0.091  | 0.091    | 0.000 ± 0.000    |
| <i>Fritillaria sp.</i>                 | S | -         | 1.00 | 26  | 13.61 | 0.769  | 428.571   | 12.972 ± 3.305     | 0.013  | 7.286    | 0.231 ± 0.057    |
| <i>Fritillaria sp.</i>                 | M | -         | 1.00 | 1   | 0.52  | 3.333  | 3.333     | 0.017 ± 0.017      | 0.200  | 0.200    | 0.001 ± 0.001    |
| Gammaridae gen. sp.                    | M | -         | 1.50 | 3   | 1.57  | 0.440  | 0.920     | 0.012 ± 0.007      | 0.251  | 0.460    | 0.006 ± 0.004    |
| Gammaridae gen. sp.                    | L | -         | 2.00 | 23  | 12.04 | 0.018  | 1.906     | 0.046 ± 0.013      | 0.180  | 19.060   | 0.456 ± 0.131    |
| <i>Globigerina sp.</i>                 | S | -         | 1.00 | 3   | 1.57  | 18.293 | 1987.500  | 20.907 ± 14.715    | 0.146  | 15.900   | 0.167 ± 0.118    |
| <i>Heterorhabdus tanneri</i>           | L | -         | 2.00 | 1   | 0.52  | 0.080  | 0.080     | 0.000 ± 0.000      | 0.312  | 0.312    | 0.002 ± 0.002    |
| <i>Limacina helicina</i>               | S | -         | 1.00 | 63  | 32.98 | 6.667  | 1333.333  | 41.052 ± 9.815     | 0.100  | 20.000   | 0.616 ± 0.147    |
| <i>Limacina helicina</i>               | M | -         | 1.00 | 45  | 23.56 | 0.056  | 50.633    | 2.228 ± 0.538      | 0.027  | 24.152   | 1.063 ± 0.257    |
| <i>Limacina helicina</i>               | L | -         | 1.00 | 30  | 15.71 | 0.002  | 44.367    | 0.424 ± 0.254      | 0.007  | 165.000  | 1.576 ± 0.944    |
| <i>Metridia pacifica</i>               | M | -         | 2.00 | 104 | 54.45 | 0.011  | 500.000   | 27.232 ± 4.847     | 0.007  | 338.000  | 18.401 ± 3.277   |
| <i>Metridia pacifica</i>               | L | -         | 2.00 | 64  | 33.51 | 0.222  | 53.111    | 3.568 ± 0.627      | 0.200  | 47.800   | 3.191 ± 0.563    |
| <i>Metridia sp.</i>                    | S | copepodit | 1.50 | 90  | 47.12 | 2.500  | 2500.000  | 135.366 ± 20.422   | 0.100  | 100.000  | 5.337 ± 0.811    |
| <i>Metridia sp.</i>                    | M | copepodit | 2.00 | 48  | 25.13 | 0.440  | 773.500   | 27.260 ± 6.987     | 0.132  | 232.050  | 8.178 ± 2.096    |
| <i>Microcalanus pygmaeus</i>           | S | -         | 1.50 | 66  | 34.55 | 7.143  | 640.000   | 35.650 ± 6.636     | 0.100  | 8.960    | 0.499 ± 0.093    |
| <i>Microsetella sp.</i>                | S | -         | 1.50 | 22  | 11.52 | 11.765 | 311.765   | 4.888 ± 1.790      | 0.200  | 5.300    | 0.092 ± 0.031    |
| Mysida gen.sp.                         | M | larvae    | 1.00 | 3   | 1.57  | 0.064  | 0.356     | 0.003 ± 0.002      | 0.011  | 0.061    | 0.000 ± 0.000    |
| Mysida gen.sp.                         | L | -         | 2.00 | 6   | 3.14  | 0.233  | 0.667     | 0.012 ± 0.005      | 13.872 | 39.766   | 0.723 ± 0.326    |
| Mysida gen.sp.                         | L | <10 mm    | 2.00 | 5   | 2.62  | 0.233  | 0.635     | 0.009 ± 0.004      | 0.538  | 1.469    | 0.020 ± 0.010    |
| Mysida gen.sp.                         | L | 10-20 mm  | 2.00 | 1   | 0.52  | 0.667  | 0.667     | 0.003 ± 0.003      | 12.765 | 12.765   | 0.067 ± 0.067    |
| <i>Neocalanus cristatus</i>            | L | -         | 2.00 | 58  | 30.37 | 0.010  | 66.375    | 1.667 ± 0.469      | 0.100  | 531.000  | 15.426 ± 4.187   |
| <i>Neocalanus plumchrus+flemingeri</i> | M | -         | 2.00 | 28  | 14.66 | 0.286  | 337.662   | 8.156 ± 2.689      | 0.100  | 118.182  | 2.900 ± 0.947    |
| <i>Neocalanus plumchrus+flemingeri</i> | L | -         | 2.00 | 136 | 71.20 | 0.004  | 476.000   | 21.971 ± 3.556     | 0.010  | 1190.000 | 56.647 ± 8.994   |
| <i>Neocalanus sp.</i>                  | S | copepodit | 1.50 | 42  | 21.99 | 9.494  | 589.286   | 21.843 ± 5.205     | 0.351  | 21.804   | 0.819 ± 0.196    |
| <i>Neocalanus sp.</i>                  | M | copepodit | 2.00 | 28  | 14.66 | 0.513  | 61.765    | 1.310 ± 0.416      | 0.180  | 21.679   | 0.460 ± 0.146    |
| <i>Oikopleura vanhoeffeni</i>          | S | -         | 1.00 | 5   | 2.62  | 2.174  | 58.824    | 0.713 ± 0.415      | 0.074  | 2.000    | 0.024 ± 0.014    |
| <i>Oikopleura vanhoeffeni</i>          | M | -         | 1.00 | 32  | 16.75 | 0.976  | 170.000   | 5.607 ± 1.699      | 0.085  | 15.300   | 0.502 ± 0.153    |
| <i>Oikopleura vanhoeffeni</i>          | L | -         | 2.00 | 54  | 28.27 | 0.100  | 45.400    | 1.800 ± 0.454      | 0.200  | 90.800   | 3.601 ± 0.908    |
| <i>Oithona similis</i>                 | S | -         | 1.50 | 172 | 90.05 | 7.143  | 15000.000 | 1664.306 ± 136.098 | 0.100  | 210.000  | 23.879 ± 1.916   |
| Ostracoda gen. sp.                     | M | -         | 1.00 | 1   | 0.52  | 2.462  | 2.462     | 0.013 ± 0.013      | 1.026  | 1.026    | 0.005 ± 0.005    |
| Paguridae gen. sp.                     | L | larvae    | 2.00 | 8   | 4.19  | 0.057  | 0.741     | 0.011 ± 0.005      | 0.200  | 2.600    | 0.040 ± 0.019    |
| <i>Parasagitta elegans</i>             | S | -         | 1.00 | 3   | 1.57  | 5.714  | 211.429   | 1.601 ± 1.201      | 0.400  | 14.800   | 0.112 ± 0.084    |
| <i>Parasagitta elegans</i>             | M | -         | 2.00 | 74  | 38.74 | 0.494  | 223.889   | 12.197 ± 2.395     | 0.099  | 40.300   | 2.277 ± 0.438    |
| <i>Parasagitta elegans</i>             | L | -         | 10.0 | 108 | 56.54 | 0.014  | 126.514   | 15.545 ± 1.766     | 0.300  | 2783.300 | 336.796 ± 38.428 |
| <i>Parasagitta elegans</i>             | L | <10 mm    | 2.00 | 46  | 24.08 | 0.224  | 30.625    | 1.490 ± 0.328      | 0.179  | 24.500   | 1.195 ± 0.263    |
| <i>Parasagitta elegans</i>             | L | 10-20 mm  | 5.00 | 100 | 52.36 | 0.794  | 53.460    | 7.211 ± 0.796      | 4.135  | 273.350  | 37.210 ± 4.101   |
| <i>Parasagitta elegans</i>             | L | 20-25 mm  | 10.0 | 85  | 44.50 | 0.971  | 91.150    | 7.234 ± 1.137      | 13.346 | 1704.500 | 122.449 ± 19.950 |
| <i>Parasagitta elegans</i>             | L | 25-30 mm  | 10.0 | 24  | 12.57 | 1.142  | 16.667    | 0.659 ± 0.173      | 34.241 | 491.667  | 20.881 ± 5.436   |
| <i>Parasagitta elegans</i>             | L | >30 mm    | 10.0 | 4   | 2.09  | 1.205  | 2.353     | 0.032 ± 0.017      | 57.012 | 125.000  | 1.591 ± 0.846    |
| Polychaeta gen. sp.                    | S | larvae    | 1.00 | 60  | 31.41 | 3.333  | 6169.355  | 223.755 ± 60.767   | 0.093  | 172.742  | 6.104 ± 1.673    |
| Polychaeta gen. sp.                    | M | larvae    | 1.00 | 18  | 9.42  | 0.440  | 91.333    | 2.116 ± 0.844      | 0.392  | 81.469   | 1.887 ± 0.753    |
| Polychaeta gen. sp.                    | L | larvae    | 2.00 | 2   | 1.05  | 0.002  | 1.120     | 0.006 ± 0.006      | 0.003  | 1.680    | 0.009 ± 0.009    |
| <i>Primno macropa</i>                  | M | -         | 1.50 | 1   | 0.52  | 0.270  | 0.270     | 0.001 ± 0.001      | 0.270  | 0.270    | 0.001 ± 0.001    |
| <i>Primno macropa</i>                  | L | -         | 3.00 | 2   | 1.05  | 0.176  | 4.000     | 0.022 ± 0.021      | 3.000  | 66.556   | 0.364 ± 0.350    |

|                                                         |   |          |      |     |       |        |          |                    |         |          |                  |
|---------------------------------------------------------|---|----------|------|-----|-------|--------|----------|--------------------|---------|----------|------------------|
| <i>Primno macropa</i>                                   | L | 7-10 mm  | 3.00 | 1   | 0.52  | 1.333  | 1.333    | 0.007 ± 0.007      | 26.400  | 26.400   | 0.138 ± 0.139    |
| <i>Primno macropa</i>                                   | L | >10 mm   | 3.00 | 1   | 0.52  | 2.667  | 2.667    | 0.014 ± 0.014      | 106.987 | 106.987  | 0.560 ± 0.562    |
| <i>Pseudocalanus minutus</i>                            | M | -        | 2.00 | 129 | 67.54 | 0.833  | 6380.833 | 125.968 ± 35.819   | 0.100   | 765.700  | 15.290 ± 4.309   |
| <i>Pseudocalanus newmani</i>                            | S | -        | 1.50 | 67  | 35.08 | 34.444 | 2555.556 | 123.804 ± 21.191   | 1.378   | 102.222  | 4.952 ± 0.848    |
| <i>Pseudocalanus sp.</i>                                | S | -        | 1.50 | 120 | 62.83 | 11.111 | 4380.682 | 490.232 ± 57.428   | 0.444   | 175.227  | 19.609 ± 2.297   |
| <i>Pseudocalanus sp.</i>                                | M | -        | 2.00 | 67  | 35.08 | 0.833  | 1261.667 | 47.956 ± 9.948     | 0.075   | 113.550  | 4.316 ± 0.895    |
| <i>Scolecithricella minor</i>                           | S | -        | 1.50 | 9   | 4.71  | 6.331  | 58.036   | 1.318 ± 0.504      | 0.506   | 4.643    | 0.103 ± 0.040    |
| <i>Scolecithricella minor</i>                           | M | -        | 2.00 | 26  | 13.61 | 0.920  | 168.445  | 2.502 ± 1.027      | 0.175   | 26.951   | 0.404 ± 0.164    |
| <i>Scolecithricella ovata</i>                           | M | -        | 2.00 | 1   | 0.52  | 0.270  | 0.270    | 0.001 ± 0.001      | 0.081   | 0.081    | 0.000 ± 0.000    |
| <i>Themisto libellula</i>                               | L | -        | 5.00 | 55  | 28.80 | 0.028  | 12.987   | 0.473 ± 0.103      | 2.100   | 967.701  | 35.356 ± 7.671   |
| <i>Themisto libellula</i>                               | L | 5-10 mm  | 3.00 | 37  | 19.37 | 0.100  | 5.357    | 0.219 ± 0.050      | 1.400   | 75.000   | 3.051 ± 0.695    |
| <i>Themisto libellula</i>                               | L | 10-20 mm | 5.00 | 37  | 19.37 | 0.549  | 12.651   | 0.525 ± 0.124      | 55.998  | 1290.402 | 53.394 ± 12.630  |
| <i>Themisto libellula</i>                               | L | 20-30 mm | 5.00 | 11  | 5.76  | 0.214  | 9.823    | 0.154 ± 0.066      | 64.200  | 2946.900 | 46.247 ± 19.884  |
| <i>Themisto pacifica</i>                                | S | -        | 1.00 | 5   | 2.62  | 2.000  | 22.464   | 0.188 ± 0.124      | 0.276   | 3.100    | 0.026 ± 0.017    |
| <i>Themisto pacifica</i>                                | M | -        | 2.00 | 30  | 15.71 | 0.200  | 17.121   | 0.491 ± 0.143      | 0.132   | 11.300   | 0.324 ± 0.094    |
| <i>Themisto pacifica</i>                                | L | -        | 3.00 | 61  | 31.94 | 0.008  | 5.000    | 0.399 ± 0.063      | 0.100   | 61.195   | 5.053 ± 0.790    |
| <i>Themisto pacifica</i>                                | L | <5 mm    | 2.00 | 37  | 19.37 | 0.163  | 2.632    | 0.174 ± 0.035      | 0.244   | 4.211    | 0.281 ± 0.056    |
| <i>Themisto pacifica</i>                                | L | 5-7 mm   | 3.00 | 18  | 9.42  | 0.326  | 4.500    | 0.106 ± 0.032      | 2.082   | 26.550   | 0.620 ± 0.188    |
| <i>Themisto pacifica</i>                                | L | 7-10 mm  | 3.00 | 9   | 4.71  | 0.027  | 1.500    | 0.023 ± 0.011      | 0.400   | 21.360   | 0.336 ± 0.155    |
| <i>Thysanoessa inermis</i>                              | L | -        | 10.0 | 39  | 20.42 | 0.031  | 33.460   | 0.636 ± 0.230      | 2.000   | 2174.900 | 40.316 ± 14.905  |
| <i>Thysanoessa inermis</i>                              | L | <10 mm   | 3.00 | 10  | 5.24  | 0.700  | 28.000   | 0.384 ± 0.174      | 2.100   | 84.000   | 1.151 ± 0.522    |
| <i>Thysanoessa inermis</i>                              | L | 10-20 mm | 5.00 | 9   | 4.71  | 0.029  | 4.000    | 0.068 ± 0.030      | 0.812   | 112.000  | 1.931 ± 0.841    |
| <i>Thysanoessa inermis</i>                              | L | 20-25 mm | 10.0 | 1   | 0.52  | 1.220  | 1.220    | 0.006 ± 0.006      | 88.049  | 88.049   | 0.461 ± 0.462    |
| <i>Thysanoessa inspinata</i>                            | L | -        | 5.00 | 6   | 3.14  | 0.144  | 1.509    | 0.023 ± 0.011      | 4.820   | 50.500   | 0.767 ± 0.378    |
| <i>Thysanoessa longipes</i>                             | L | -        | 5.00 | 17  | 8.90  | 0.009  | 1.948    | 0.042 ± 0.017      | 0.800   | 157.516  | 3.438 ± 1.363    |
| <i>Thysanoessa longipes</i>                             | L | <10 mm   | 3.00 | 21  | 10.99 | 0.175  | 3.778    | 0.088 ± 0.027      | 0.700   | 15.112   | 0.351 ± 0.109    |
| <i>Thysanoessa longipes</i>                             | L | 10-20 mm | 5.00 | 6   | 3.14  | 0.549  | 1.948    | 0.027 ± 0.013      | 14.098  | 49.395   | 0.677 ± 0.319    |
| <i>Thysanoessa longipes</i>                             | L | 20-25 mm | 10.0 | 1   | 0.52  | 2.448  | 2.448    | 0.013 ± 0.013      | 186.071 | 186.071  | 0.974 ± 0.977    |
| <i>Thysanoessa raschii</i>                              | L | -        | 10.0 | 57  | 29.84 | 0.009  | 74.390   | 1.292 ± 0.437      | 0.600   | 5951.220 | 100.572 ± 34.807 |
| <i>Thysanoessa raschii</i>                              | L | <10 mm   | 3.00 | 53  | 27.75 | 0.043  | 64.634   | 1.092 ± 0.376      | 0.150   | 238.177  | 3.978 ± 1.382    |
| <i>Thysanoessa raschii</i>                              | L | 10-20 mm | 5.00 | 15  | 7.85  | 0.485  | 16.049   | 0.206 ± 0.098      | 12.125  | 401.235  | 5.299 ± 2.492    |
| <i>Thysanoessa raschii</i>                              | L | 20-25 mm | 10.0 | 13  | 6.81  | 1.087  | 9.756    | 0.141 ± 0.058      | 73.043  | 704.390  | 10.295 ± 4.198   |
| <i>Tomopteris sp.</i>                                   | L | -        | 2.00 | 1   | 0.52  | 0.125  | 0.125    | 0.001 ± 0.001      | 1.040   | 1.040    | 0.005 ± 0.005    |
| <i>Triconia borealis</i>                                | S | -        | 1.50 | 75  | 39.27 | 2.000  | 815.625  | 39.941 ± 7.347     | 0.066   | 24.469   | 1.255 ± 0.224    |
| Amphipods                                               |   |          |      |     |       |        |          | 2.854 ± 0.275      |         |          | 146.216 ± 24.807 |
| Copepods                                                |   |          |      |     |       |        |          | 3305.721 ± 161.137 |         |          | 520.228 ± 27.675 |
| Gelatinous (jellyfish. comb jellies. pelagic tunicates) |   |          |      |     |       |        |          | 21.841 ± 3.779     |         |          | 20.091 ± 4.253   |
| Pteropods                                               |   |          |      |     |       |        |          | 45.817 ± 9.847     |         |          | 5.335 ± 1.047    |
| Cumaceans                                               |   |          |      |     |       |        |          | 1.108 ± 0.533      |         |          | 20.287 ± 9.879   |
| Meroplankton (larvae of benthic animals)                |   |          |      |     |       |        |          | 382.813 ± 68.040   |         |          | 12.378 ± 2.045   |
| Mysids                                                  |   |          |      |     |       |        |          | 0.027 ± 0.008      |         |          | 0.810 ± 0.333    |
| Protozoa                                                |   |          |      |     |       |        |          | 20.907 ± 14.715    |         |          | 0.167 ± 0.118    |
| Other groups                                            |   |          |      |     |       |        |          | 0.001 ± 0.001      |         |          | 0.005 ± 0.005    |
| Ostracods                                               |   |          |      |     |       |        |          | 0.013 ± 0.013      |         |          | 0.005 ± 0.005    |

|                    |                        |                       |
|--------------------|------------------------|-----------------------|
| Chaetognaths       | $45.969 \pm 3.516$     | $522.510 \pm 43.842$  |
| Euphausiids        | $14.667 \pm 3.237$     | $180.854 \pm 38.322$  |
| Entire zooplankton | $3841.737 \pm 175.914$ | $1428.887 \pm 69.950$ |



**Table 7** from Volkov AF. Volvenko IV (2016a) Net Zooplankton of the Western Part of the Bering Sea: Occurrence, Abundance, and Biomass. 1986-2013. TINRO-Center, Vladivostok

The abundance of zooplankton in epipelagial regardless of season and time of day. Averaging data over the entire observation period. Region No. 5 (407 stations)

| Species<br>or taxonomic group       | Frac-<br>tion | Stage or<br>size group | C.E. | Occurrence |       | Number. ind./m <sup>3</sup> |          |                  | Biomass. mg/m <sup>3</sup> |          |                |
|-------------------------------------|---------------|------------------------|------|------------|-------|-----------------------------|----------|------------------|----------------------------|----------|----------------|
|                                     |               |                        |      | samples    | %     | Min                         | Max      | Average          | Min                        | Max      | Average        |
| <i>Acartia longiremis</i>           | S             | -                      | 1.50 | 38         | 9.34  | 0.250                       | 400.000  | 4.277 ± 1.275    | 0.013                      | 20.000   | 0.208 ± 0.063  |
| <i>Acartia longiremis</i>           | M             | -                      | 2.00 | 21         | 5.16  | 0.300                       | 228.000  | 0.771 ± 0.567    | 0.049                      | 36.936   | 0.125 ± 0.092  |
| <i>Acartia tumida</i>               | M             | -                      | 2.00 | 7          | 1.72  | 0.364                       | 100.000  | 0.354 ± 0.260    | 0.055                      | 15.000   | 0.053 ± 0.039  |
| <i>Aglantha digitale</i>            | S             | -                      | 1.00 | 3          | 0.74  | 0.846                       | 33.582   | 0.125 ± 0.092    | 0.127                      | 5.037    | 0.019 ± 0.014  |
| <i>Aglantha digitale</i>            | M             | -                      | 1.00 | 27         | 6.63  | 0.100                       | 14.706   | 0.184 ± 0.054    | 0.132                      | 19.368   | 0.242 ± 0.072  |
| <i>Aglantha digitale</i>            | L             | -                      | 1.00 | 230        | 56.51 | 0.001                       | 3.300    | 0.144 ± 0.017    | 0.150                      | 495.074  | 21.739 ± 2.510 |
| <i>Balanus sp.</i>                  | S             | nauplius               | 1.00 | 15         | 3.69  | 6.250                       | 2356.250 | 9.659 ± 6.026    | 0.099                      | 37.700   | 0.151 ± 0.096  |
| <i>Balanus sp.</i>                  | M             | cypris                 | 1.00 | 6          | 1.47  | 0.860                       | 111.000  | 0.378 ± 0.282    | 0.195                      | 25.197   | 0.086 ± 0.064  |
| <i>Balanus sp.</i>                  | M             | nauplius               | 1.00 | 7          | 1.72  | 0.050                       | 619.298  | 1.992 ± 1.577    | 0.006                      | 70.600   | 0.227 ± 0.180  |
| <i>Beroe cucumis</i>                | L             | -                      | 1.00 | 7          | 1.72  | 0.029                       | 8.933    | 0.024 ± 0.022    | 5.335                      | 1643.458 | 4.387 ± 4.047  |
| <i>Bivalvia gen. sp.</i>            | S             | larvae                 | 1.00 | 94         | 23.10 | 1.000                       | 9410.000 | 131.604 ± 40.139 | 0.008                      | 75.280   | 1.053 ± 0.321  |
| Brachyura+Lithodidae gen. sp.       | L             | larvae                 | 2.00 | 82         | 20.15 | 0.013                       | 13.034   | 0.278 ± 0.059    | 0.100                      | 101.317  | 2.158 ± 0.455  |
| <i>Bradyidius pacificus</i>         | M             | -                      | 2.00 | 13         | 3.19  | 0.394                       | 6.667    | 0.052 ± 0.020    | 0.195                      | 3.293    | 0.026 ± 0.010  |
| <i>Bradyidius pacificus</i>         | L             | -                      | 2.00 | 5          | 1.23  | 0.075                       | 1.774    | 0.006 ± 0.004    | 0.102                      | 2.423    | 0.008 ± 0.006  |
| <i>Calanus glacialis+marshallae</i> | M             | -                      | 2.00 | 163        | 40.05 | 0.127                       | 2845.588 | 27.173 ± 8.943   | 0.058                      | 1289.051 | 12.316 ± 4.051 |
| <i>Calanus glacialis+marshallae</i> | L             | -                      | 2.00 | 231        | 56.76 | 0.037                       | 734.244  | 17.747 ± 3.273   | 0.100                      | 1710.788 | 43.141 ± 7.721 |
| <i>Calanus pacificus</i>            | M             | -                      | 2.00 | 7          | 1.72  | 0.040                       | 2.200    | 0.012 ± 0.007    | 0.020                      | 1.100    | 0.006 ± 0.004  |
| <i>Calanus pacificus</i>            | L             | -                      | 2.00 | 1          | 0.25  | 0.100                       | 0.100    | 0.000 ± 0.000    | 0.084                      | 0.084    | 0.000 ± 0.000  |
| <i>Candacia columbiae</i>           | L             | -                      | 2.00 | 10         | 2.46  | 0.056                       | 1.203    | 0.006 ± 0.003    | 0.160                      | 3.429    | 0.016 ± 0.009  |
| Caridea gen. sp.                    | L             | larvae                 | 2.00 | 38         | 9.34  | 0.057                       | 18.235   | 0.180 ± 0.057    | 0.174                      | 55.125   | 0.531 ± 0.171  |
| <i>Centropages abdominalis</i>      | S             | -                      | 1.50 | 29         | 7.13  | 0.167                       | 2103.333 | 11.102 ± 5.373   | 0.010                      | 105.167  | 0.569 ± 0.269  |
| <i>Centropages abdominalis</i>      | M             | -                      | 2.00 | 48         | 11.79 | 0.500                       | 2472.000 | 26.373 ± 8.540   | 0.075                      | 370.800  | 3.956 ± 1.281  |
| <i>Chiridius sp.</i>                | L             | -                      | 2.00 | 8          | 1.97  | 0.333                       | 9.000    | 0.042 ± 0.024    | 0.800                      | 21.600   | 0.101 ± 0.057  |
| <i>Clione limacina</i>              | S             | -                      | 1.00 | 80         | 19.66 | 0.019                       | 6980.315 | 19.331 ± 17.169  | 0.001                      | 279.213  | 0.773 ± 0.687  |
| <i>Clione limacina</i>              | M             | -                      | 2.00 | 79         | 19.41 | 0.022                       | 6.889    | 0.233 ± 0.036    | 0.019                      | 6.200    | 0.204 ± 0.032  |
| <i>Clione limacina</i>              | L             | -                      | 2.00 | 169        | 41.52 | 0.001                       | 4.966    | 0.091 ± 0.017    | 0.060                      | 248.276  | 4.558 ± 0.871  |
| Copepoda gen. sp.                   | S             | -                      | 1.50 | 4          | 0.98  | 22.277                      | 744.485  | 2.183 ± 1.845    | 1.114                      | 37.224   | 0.109 ± 0.092  |
| Copepoda gen. sp.                   | S             | copepodit              | 1.00 | 2          | 0.49  | 30.822                      | 33.835   | 0.159 ± 0.112    | 6.164                      | 6.767    | 0.032 ± 0.022  |
| Copepoda gen. sp.                   | S             | nauplius               | 1.00 | 277        | 68.06 | 0.667                       | 2713.333 | 166.641 ± 16.402 | 0.010                      | 40.700   | 2.309 ± 0.232  |
| Copepoda gen. sp.                   | S             | ova                    | 1.00 | 32         | 7.86  | 1.654                       | 3150.000 | 27.895 ± 12.724  | 0.007                      | 12.600   | 0.112 ± 0.051  |
| Cumacea gen. sp.                    | M             | -                      | 1.00 | 21         | 5.16  | 0.099                       | 16.800   | 0.154 ± 0.053    | 0.058                      | 9.828    | 0.090 ± 0.031  |
| Cumacea gen. sp.                    | L             | -                      | 2.00 | 8          | 1.97  | 0.060                       | 56.153   | 0.521 ± 0.255    | 1.113                      | 1041.854 | 9.666 ± 4.737  |
| Decapoda gen. sp.                   | M             | larvae                 | 2.00 | 3          | 0.74  | 0.294                       | 3.731    | 0.012 ± 0.009    | 0.103                      | 1.306    | 0.004 ± 0.003  |
| <i>Dimophyes arctica</i>            | M             | -                      | 1.00 | 24         | 5.90  | 0.100                       | 10.000   | 0.083 ± 0.029    | 0.200                      | 22.260   | 0.179 ± 0.065  |
| <i>Dimophyes arctica</i>            | L             | -                      | 1.00 | 79         | 19.41 | 0.011                       | 2.204    | 0.075 ± 0.013    | 0.100                      | 19.700   | 0.683 ± 0.118  |
| <i>Diphyes sp.</i>                  | L             | -                      | 1.00 | 4          | 0.98  | 0.129                       | 2.814    | 0.009 ± 0.007    | 0.900                      | 19.700   | 0.064 ± 0.050  |
| Echinodermata gen. sp.              | S             | larvae                 | 1.00 | 19         | 4.67  | 1.000                       | 53.333   | 0.516 ± 0.165    | 0.008                      | 0.427    | 0.004 ± 0.001  |
| Echinodermata gen. sp.              | M             | larvae                 | 1.00 | 1          | 0.25  | 5.495                       | 5.495    | 0.014 ± 0.014    | 0.989                      | 0.989    | 0.002 ± 0.002  |
| <i>Eucalanus bungii</i>             | S             | -                      | 1.50 | 25         | 6.14  | 8.459                       | 317.143  | 4.388 ± 1.374    | 0.736                      | 22.200   | 0.352 ± 0.105  |

|                                        |   |            |      |     |       |        |           |                    |        |          |                 |
|----------------------------------------|---|------------|------|-----|-------|--------|-----------|--------------------|--------|----------|-----------------|
| <i>Eucalanus bungii</i>                | M | -          | 2.00 | 288 | 70.76 | 0.100  | 1184.600  | 28.694 ± 4.619     | 0.200  | 2369.200 | 57.388 ± 9.239  |
| <i>Eucalanus bungii</i>                | L | -          | 2.00 | 364 | 89.43 | 0.014  | 154.807   | 14.368 ± 1.147     | 0.100  | 1176.534 | 102.821 ± 8.217 |
| <i>Euphausia</i> gen. sp.              | L | furcilia   | 2.00 | 140 | 34.40 | 0.015  | 2648.200  | 15.981 ± 9.219     | 0.045  | 7944.600 | 47.855 ± 27.656 |
| <i>Euphausia pacifica</i>              | L | -          | 10.0 | 1   | 0.25  | 1.286  | 1.286     | 0.003 ± 0.003      | 45.000 | 45.000   | 0.111 ± 0.111   |
| <i>Euphausiacea</i> gen. sp.           | S | calyptopis | 1.00 | 15  | 3.69  | 0.125  | 471.250   | 4.353 ± 1.633      | 0.010  | 37.700   | 0.348 ± 0.131   |
| <i>Euphausiacea</i> gen. sp.           | S | nauplius   | 1.00 | 28  | 6.88  | 0.827  | 792.500   | 8.643 ± 2.675      | 0.037  | 31.700   | 0.352 ± 0.108   |
| <i>Euphausiacea</i> gen. sp.           | S | ova        | 1.00 | 11  | 2.70  | 1.654  | 1113.333  | 7.085 ± 3.419      | 0.050  | 33.400   | 0.213 ± 0.103   |
| <i>Euphausiacea</i> gen. sp.           | M | calyptopis | 2.00 | 65  | 15.97 | 0.020  | 108.522   | 1.290 ± 0.417      | 0.008  | 44.820   | 0.533 ± 0.172   |
| <i>Euphausiacea</i> gen. sp.           | M | furcilia   | 2.00 | 16  | 3.93  | 0.125  | 11.375    | 0.112 ± 0.044      | 0.225  | 20.475   | 0.202 ± 0.079   |
| <i>Euphausiacea</i> gen. sp.           | M | juvenis    | 2.00 | 23  | 5.65  | 0.333  | 186.916   | 1.251 ± 0.592      | 0.600  | 336.449  | 2.252 ± 1.065   |
| <i>Fritillaria</i> sp.                 | S | -          | 1.00 | 26  | 6.39  | 0.769  | 294.393   | 3.457 ± 1.209      | 0.013  | 5.005    | 0.061 ± 0.021   |
| <i>Gaetanus simplex</i>                | L | -          | 2.00 | 5   | 1.23  | 0.099  | 1.203     | 0.008 ± 0.004      | 0.257  | 3.128    | 0.021 ± 0.011   |
| <i>Gaetanus</i> sp.                    | M | -          | 2.00 | 1   | 0.25  | 0.149  | 0.149     | 0.000 ± 0.000      | 0.076  | 0.076    | 0.000 ± 0.000   |
| <i>Gaetanus</i> sp.                    | L | -          | 2.00 | 12  | 2.95  | 0.006  | 0.907     | 0.010 ± 0.004      | 0.010  | 2.086    | 0.020 ± 0.008   |
| <i>Gaidius variabilis</i>              | M | -          | 2.00 | 2   | 0.49  | 3.038  | 5.000     | 0.020 ± 0.014      | 3.232  | 5.320    | 0.021 ± 0.015   |
| <i>Gammaridae</i> gen. sp.             | M | -          | 1.50 | 1   | 0.25  | 1.000  | 1.000     | 0.002 ± 0.002      | 0.500  | 0.500    | 0.001 ± 0.001   |
| <i>Gammaridae</i> gen. sp.             | L | -          | 2.00 | 29  | 7.13  | 0.018  | 114.171   | 0.773 ± 0.405      | 0.180  | 1141.710 | 7.729 ± 4.052   |
| <i>Globigerina</i> sp.                 | S | -          | 1.00 | 95  | 23.34 | 1.103  | 1200.000  | 24.886 ± 5.049     | 0.009  | 9.600    | 0.199 ± 0.040   |
| <i>Heterorhabdus tanneri</i>           | L | -          | 2.00 | 10  | 2.46  | 0.016  | 0.260     | 0.002 ± 0.001      | 0.062  | 1.014    | 0.009 ± 0.004   |
| <i>Hyperia galba</i>                   | L | -          | 3.00 | 2   | 0.49  | 0.050  | 0.078     | 0.000 ± 0.000      | 1.235  | 1.930    | 0.008 ± 0.006   |
| <i>Limacina helicina</i>               | S | -          | 1.00 | 158 | 38.82 | 0.667  | 13700.000 | 105.602 ± 38.869   | 0.010  | 205.500  | 1.584 ± 0.583   |
| <i>Limacina helicina</i>               | M | -          | 1.00 | 133 | 32.68 | 0.006  | 1509.000  | 16.402 ± 5.089     | 0.003  | 719.793  | 7.822 ± 2.428   |
| <i>Limacina helicina</i>               | L | -          | 1.00 | 146 | 35.87 | 0.005  | 37.140    | 0.439 ± 0.132      | 0.019  | 138.124  | 1.632 ± 0.492   |
| <i>Metridia pacifica</i>               | M | -          | 2.00 | 324 | 79.61 | 0.080  | 1151.479  | 42.820 ± 4.605     | 0.054  | 778.400  | 28.925 ± 3.113  |
| <i>Metridia pacifica</i>               | L | -          | 2.00 | 261 | 64.13 | 0.033  | 214.778   | 8.256 ± 1.122      | 0.030  | 193.300  | 7.366 ± 1.003   |
| <i>Metridia</i> sp.                    | S | copepodit  | 1.50 | 228 | 56.02 | 0.250  | 3087.500  | 119.204 ± 13.359   | 0.010  | 120.413  | 4.677 ± 0.522   |
| <i>Metridia</i> sp.                    | M | copepodit  | 2.00 | 108 | 26.54 | 0.989  | 724.638   | 28.293 ± 4.145     | 0.297  | 217.391  | 8.488 ± 1.243   |
| <i>Microcalanus pygmaeus</i>           | S | -          | 1.50 | 270 | 66.34 | 3.750  | 4164.286  | 108.785 ± 13.426   | 0.053  | 58.300   | 1.523 ± 0.188   |
| <i>Microsetella</i> sp.                | S | -          | 1.50 | 170 | 41.77 | 0.588  | 1111.765  | 24.474 ± 3.932     | 0.010  | 18.900   | 0.440 ± 0.067   |
| <i>Mysida</i> gen.sp.                  | M | larvae     | 1.00 | 12  | 2.95  | 0.017  | 5.882     | 0.066 ± 0.026      | 0.003  | 1.000    | 0.011 ± 0.004   |
| <i>Mysida</i> gen.sp.                  | L | -          | 2.00 | 12  | 2.95  | 0.097  | 1.143     | 0.009 ± 0.003      | 5.763  | 68.170   | 0.536 ± 0.206   |
| <i>Mysida</i> gen.sp.                  | L | <10 mm     | 2.00 | 12  | 2.95  | 0.097  | 1.644     | 0.011 ± 0.005      | 0.224  | 3.804    | 0.026 ± 0.012   |
| <i>Mysida</i> gen.sp.                  | L | 10-20 mm   | 2.00 | 6   | 1.47  | 0.316  | 1.027     | 0.008 ± 0.004      | 6.059  | 19.664   | 0.148 ± 0.068   |
| <i>Neocalanus cristatus</i>            | M | -          | 2.00 | 9   | 2.21  | 0.125  | 27.500    | 0.152 ± 0.081      | 0.050  | 11.000   | 0.062 ± 0.033   |
| <i>Neocalanus cristatus</i>            | L | -          | 2.00 | 309 | 75.92 | 0.083  | 103.188   | 6.417 ± 0.645      | 0.800  | 1031.884 | 59.245 ± 5.916  |
| <i>Neocalanus plumchrus+flemingeri</i> | M | -          | 2.00 | 133 | 32.68 | 0.143  | 282.857   | 6.016 ± 1.045      | 0.050  | 99.000   | 2.142 ± 0.369   |
| <i>Neocalanus plumchrus+flemingeri</i> | L | -          | 2.00 | 380 | 93.37 | 0.040  | 340.440   | 35.653 ± 2.718     | 0.100  | 851.100  | 92.178 ± 6.977  |
| <i>Neocalanus</i> sp.                  | S | copepodit  | 1.50 | 99  | 24.32 | 3.333  | 909.926   | 12.605 ± 3.155     | 0.123  | 33.667   | 0.466 ± 0.117   |
| <i>Neocalanus</i> sp.                  | M | copepodit  | 2.00 | 78  | 19.16 | 0.197  | 1238.014  | 5.269 ± 3.125      | 0.069  | 434.543  | 1.849 ± 1.097   |
| <i>Oikopleura vanhoeffeni</i>          | S | -          | 1.00 | 23  | 5.65  | 0.652  | 158.696   | 2.072 ± 0.676      | 0.022  | 5.396    | 0.070 ± 0.023   |
| <i>Oikopleura vanhoeffeni</i>          | M | -          | 1.00 | 98  | 24.08 | 0.100  | 1394.444  | 17.494 ± 5.298     | 0.009  | 125.500  | 1.554 ± 0.475   |
| <i>Oikopleura vanhoeffeni</i>          | L | -          | 2.00 | 87  | 21.38 | 0.030  | 88.150    | 1.042 ± 0.312      | 0.060  | 176.300  | 2.083 ± 0.623   |
| <i>Oithona plumifera</i>               | S | -          | 1.50 | 1   | 0.25  | 13.636 | 13.636    | 0.034 ± 0.034      | 0.314  | 0.314    | 0.001 ± 0.001   |
| <i>Oithona similis</i>                 | S | -          | 1.50 | 371 | 91.15 | 28.037 | 37642.855 | 1623.720 ± 133.514 | 0.421  | 527.000  | 23.202 ± 1.870  |

|                                  |   |           |      |     |       |        |          |                  |        |          |                  |
|----------------------------------|---|-----------|------|-----|-------|--------|----------|------------------|--------|----------|------------------|
| Ostracoda gen. sp.               | S | -         | 1.00 | 15  | 3.69  | 1.031  | 97.403   | 0.625 ± 0.276    | 0.100  | 9.448    | 0.061 ± 0.027    |
| Ostracoda gen. sp.               | M | -         | 1.00 | 39  | 9.58  | 0.111  | 10.000   | 0.174 ± 0.039    | 0.046  | 5.000    | 0.075 ± 0.018    |
| Ostracoda gen. sp.               | L | -         | 1.00 | 79  | 19.41 | 0.005  | 1.290    | 0.046 ± 0.007    | 0.007  | 1.900    | 0.069 ± 0.011    |
| Paguridae gen. sp.               | L | larvae    | 2.00 | 54  | 13.27 | 0.014  | 8.034    | 0.069 ± 0.027    | 0.049  | 28.200   | 0.241 ± 0.096    |
| <i>Paraeuchaeta elongata</i>     | L | -         | 2.00 | 62  | 15.23 | 0.002  | 3.571    | 0.080 ± 0.017    | 0.010  | 15.000   | 0.334 ± 0.070    |
| <i>Parasagitta elegans</i>       | S | -         | 1.00 | 14  | 3.44  | 2.857  | 91.429   | 0.617 ± 0.254    | 0.200  | 6.400    | 0.043 ± 0.018    |
| <i>Parasagitta elegans</i>       | M | -         | 2.00 | 187 | 45.95 | 0.035  | 211.000  | 7.306 ± 1.099    | 0.006  | 42.200   | 1.434 ± 0.218    |
| <i>Parasagitta elegans</i>       | L | -         | 10.0 | 256 | 62.90 | 0.177  | 61.091   | 7.263 ± 0.493    | 3.900  | 1344.000 | 156.326 ± 10.612 |
| <i>Parasagitta elegans</i>       | L | <10 mm    | 2.00 | 78  | 19.16 | 0.200  | 27.820   | 0.673 ± 0.117    | 0.160  | 21.764   | 0.535 ± 0.092    |
| <i>Parasagitta elegans</i>       | L | 10-20 mm  | 5.00 | 208 | 51.11 | 0.278  | 43.233   | 4.757 ± 0.375    | 1.500  | 217.711  | 24.221 ± 1.890   |
| <i>Parasagitta elegans</i>       | L | 20-25 mm  | 10.0 | 174 | 42.75 | 0.444  | 36.207   | 1.827 ± 0.174    | 6.908  | 544.598  | 29.472 ± 2.759   |
| <i>Parasagitta elegans</i>       | L | 25-30 mm  | 10.0 | 85  | 20.88 | 0.493  | 9.000    | 0.550 ± 0.067    | 14.532 | 265.440  | 17.625 ± 2.159   |
| <i>Parasagitta elegans</i>       | L | >30 mm    | 10.0 | 52  | 12.78 | 0.483  | 8.451    | 0.247 ± 0.045    | 22.589 | 483.084  | 13.621 ± 2.595   |
| <i>Pareuchaeta sp.</i>           | M | copepodit | 2.00 | 22  | 5.41  | 0.029  | 10.714   | 0.063 ± 0.028    | 0.020  | 7.500    | 0.045 ± 0.020    |
| <i>Pleuromamma scutullata</i>    | L | -         | 2.00 | 3   | 0.74  | 0.097  | 0.200    | 0.001 ± 0.001    | 0.213  | 0.440    | 0.002 ± 0.001    |
| <i>Podon leuckartii</i>          | S | -         | 1.00 | 2   | 0.49  | 83.333 | 83.333   | 0.409 ± 0.290    | 2.250  | 2.250    | 0.011 ± 0.008    |
| Polychaeta gen. sp.              | S | larvae    | 1.00 | 64  | 15.72 | 0.827  | 7700.000 | 165.772 ± 34.990 | 0.022  | 183.167  | 4.517 ± 0.930    |
| Polychaeta gen. sp.              | M | larvae    | 1.00 | 61  | 14.99 | 0.033  | 41.739   | 0.524 ± 0.130    | 0.029  | 37.231   | 0.467 ± 0.116    |
| Polychaeta gen. sp.              | L | larvae    | 2.00 | 28  | 6.88  | 0.020  | 0.960    | 0.021 ± 0.005    | 0.030  | 1.440    | 0.031 ± 0.008    |
| <i>Primno macropa</i>            | M | -         | 1.50 | 2   | 0.49  | 1.758  | 3.500    | 0.013 ± 0.010    | 1.758  | 3.500    | 0.013 ± 0.010    |
| <i>Primno macropa</i>            | L | -         | 3.00 | 13  | 3.19  | 0.071  | 1.118    | 0.012 ± 0.004    | 1.200  | 19.000   | 0.205 ± 0.073    |
| <i>Primno macropa</i>            | L | <5 mm     | 2.00 | 2   | 0.49  | 0.143  | 0.257    | 0.001 ± 0.001    | 0.331  | 0.596    | 0.002 ± 0.002    |
| <i>Primno macropa</i>            | L | 5-7 mm    | 3.00 | 1   | 0.25  | 0.148  | 0.148    | 0.000 ± 0.000    | 0.997  | 0.997    | 0.002 ± 0.002    |
| <i>Primno macropa</i>            | L | 7-10 mm   | 3.00 | 4   | 0.98  | 0.049  | 0.556    | 0.004 ± 0.002    | 0.969  | 11.000   | 0.075 ± 0.042    |
| <i>Primno macropa</i>            | L | >10 mm    | 3.00 | 1   | 0.25  | 0.246  | 0.246    | 0.001 ± 0.001    | 9.882  | 9.882    | 0.024 ± 0.024    |
| <i>Pseudocalanus minutus</i>     | M | -         | 2.00 | 252 | 61.92 | 0.300  | 2580.000 | 71.824 ± 11.552  | 0.038  | 309.600  | 8.721 ± 1.391    |
| <i>Pseudocalanus newmani</i>     | S | -         | 1.50 | 138 | 33.91 | 1.111  | 1706.667 | 64.214 ± 9.085   | 0.044  | 68.267   | 2.569 ± 0.363    |
| <i>Pseudocalanus sp.</i>         | S | -         | 1.50 | 246 | 60.44 | 0.556  | 4952.381 | 241.595 ± 26.322 | 0.022  | 198.095  | 9.664 ± 1.053    |
| <i>Pseudocalanus sp.</i>         | M | -         | 2.00 | 138 | 33.91 | 0.833  | 1251.667 | 34.169 ± 6.312   | 0.075  | 112.650  | 3.075 ± 0.568    |
| <i>Racovitzanus antarcticus</i>  | M | -         | 2.00 | 26  | 6.39  | 0.214  | 38.000   | 0.216 ± 0.101    | 0.060  | 10.640   | 0.062 ± 0.029    |
| <i>Scolecithricella minor</i>    | S | -         | 1.50 | 59  | 14.50 | 0.125  | 45.000   | 1.407 ± 0.261    | 0.010  | 3.600    | 0.106 ± 0.020    |
| <i>Scolecithricella minor</i>    | M | -         | 2.00 | 138 | 33.91 | 0.063  | 29.375   | 1.475 ± 0.177    | 0.010  | 4.700    | 0.251 ± 0.029    |
| <i>Scolecithricella ovata</i>    | M | -         | 2.00 | 1   | 0.25  | 5.000  | 5.000    | 0.012 ± 0.012    | 1.500  | 1.500    | 0.004 ± 0.004    |
| <i>Tessarobranchion oculatus</i> | L | -         | 10.0 | 1   | 0.25  | 0.756  | 0.756    | 0.002 ± 0.002    | 34.000 | 34.000   | 0.084 ± 0.084    |
| <i>Themisto libellula</i>        | L | -         | 5.00 | 21  | 5.16  | 0.004  | 3.367    | 0.026 ± 0.010    | 0.300  | 252.500  | 1.944 ± 0.720    |
| <i>Themisto libellula</i>        | L | 5-10 mm   | 3.00 | 50  | 12.29 | 0.145  | 10.833   | 0.197 ± 0.046    | 1.700  | 151.662  | 2.743 ± 0.647    |
| <i>Themisto libellula</i>        | L | 10-20 mm  | 5.00 | 35  | 8.60  | 0.246  | 8.042    | 0.125 ± 0.033    | 25.680 | 820.284  | 12.726 ± 3.353   |
| <i>Themisto libellula</i>        | L | 20-30 mm  | 5.00 | 7   | 1.72  | 0.145  | 1.614    | 0.013 ± 0.006    | 43.500 | 484.200  | 3.885 ± 1.726    |
| <i>Themisto pacifica</i>         | S | -         | 1.00 | 34  | 8.35  | 0.325  | 112.500  | 0.627 ± 0.300    | 0.045  | 15.525   | 0.087 ± 0.041    |
| <i>Themisto pacifica</i>         | M | -         | 2.00 | 183 | 44.96 | 0.120  | 40.200   | 1.642 ± 0.205    | 0.079  | 26.532   | 1.084 ± 0.135    |
| <i>Themisto pacifica</i>         | L | -         | 3.00 | 216 | 53.07 | 0.015  | 10.400   | 0.854 ± 0.074    | 0.200  | 127.286  | 10.825 ± 0.938   |
| <i>Themisto pacifica</i>         | L | <5 mm     | 2.00 | 165 | 40.54 | 0.033  | 8.453    | 0.586 ± 0.061    | 0.050  | 12.930   | 0.936 ± 0.097    |
| <i>Themisto pacifica</i>         | L | 5-7 mm    | 3.00 | 63  | 15.48 | 0.146  | 9.091    | 0.151 ± 0.032    | 0.839  | 51.519   | 0.896 ± 0.183    |
| <i>Themisto pacifica</i>         | L | 7-10 mm   | 3.00 | 18  | 4.42  | 0.047  | 0.870    | 0.013 ± 0.004    | 0.700  | 12.220   | 0.194 ± 0.055    |

|                                                         |   |          |      |     |       |       |         |                    |        |          |                   |
|---------------------------------------------------------|---|----------|------|-----|-------|-------|---------|--------------------|--------|----------|-------------------|
| <i>Themisto pacifica</i>                                | L | >10 mm   | 3.00 | 2   | 0.49  | 0.246 | 1.788   | 0.005 ± 0.004      | 7.304  | 44.704   | 0.128 ± 0.111     |
| <i>Thysanoessa inermis</i>                              | L | -        | 10.0 | 95  | 23.34 | 0.011 | 32.923  | 0.829 ± 0.154      | 0.600  | 2140.000 | 53.226 ± 9.967    |
| <i>Thysanoessa inermis</i>                              | L | <10 mm   | 3.00 | 17  | 4.18  | 0.098 | 9.467   | 0.090 ± 0.036      | 0.295  | 28.400   | 0.271 ± 0.108     |
| <i>Thysanoessa inermis</i>                              | L | 10-20 mm | 5.00 | 32  | 7.86  | 0.056 | 4.324   | 0.077 ± 0.020      | 1.568  | 121.072  | 2.140 ± 0.546     |
| <i>Thysanoessa inermis</i>                              | L | 20-25 mm | 10.0 | 20  | 4.91  | 0.578 | 7.389   | 0.141 ± 0.037      | 41.734 | 591.133  | 11.291 ± 2.940    |
| <i>Thysanoessa inspinata</i>                            | L | -        | 5.00 | 6   | 1.47  | 0.131 | 1.637   | 0.010 ± 0.005      | 4.400  | 54.789   | 0.332 ± 0.173     |
| <i>Thysanoessa longipes</i>                             | L | -        | 5.00 | 90  | 22.11 | 0.005 | 3.706   | 0.135 ± 0.023      | 0.400  | 315.000  | 11.222 ± 1.875    |
| <i>Thysanoessa longipes</i>                             | L | <10 mm   | 3.00 | 60  | 14.74 | 0.015 | 7.175   | 0.102 ± 0.025      | 0.060  | 28.700   | 0.407 ± 0.098     |
| <i>Thysanoessa longipes</i>                             | L | 10-20 mm | 5.00 | 41  | 10.07 | 0.056 | 4.861   | 0.083 ± 0.018      | 1.420  | 123.256  | 2.121 ± 0.471     |
| <i>Thysanoessa longipes</i>                             | L | 20-25 mm | 10.0 | 10  | 2.46  | 0.493 | 13.990  | 0.074 ± 0.041      | 37.438 | 1063.265 | 5.589 ± 3.090     |
| <i>Thysanoessa longipes</i>                             | L | >25 mm   | 10.0 | 9   | 2.21  | 0.235 | 1.449   | 0.013 ± 0.005      | 32.911 | 207.391  | 1.913 ± 0.721     |
| <i>Thysanoessa raschii</i>                              | L | -        | 10.0 | 54  | 13.27 | 0.013 | 7.600   | 0.212 ± 0.041      | 0.900  | 532.000  | 15.509 ± 2.940    |
| <i>Thysanoessa raschii</i>                              | L | <10 mm   | 3.00 | 34  | 8.35  | 0.040 | 25.275  | 0.222 ± 0.076      | 0.140  | 93.138   | 0.815 ± 0.280     |
| <i>Thysanoessa raschii</i>                              | L | 10-20 mm | 5.00 | 29  | 7.13  | 0.262 | 7.190   | 0.092 ± 0.026      | 6.550  | 200.735  | 2.382 ± 0.683     |
| <i>Thysanoessa raschii</i>                              | L | 20-25 mm | 10.0 | 22  | 5.41  | 0.575 | 15.309  | 0.133 ± 0.047      | 42.886 | 1178.776 | 9.876 ± 3.591     |
| <i>Tomopteris sp.</i>                                   | L | -        | 2.00 | 26  | 6.39  | 0.043 | 1.329   | 0.015 ± 0.005      | 0.430  | 13.290   | 0.150 ± 0.048     |
| <i>Tomopteris sp.</i>                                   | L | 10 mm    | 2.00 | 8   | 1.97  | 0.048 | 0.150   | 0.001 ± 0.001      | 0.300  | 0.931    | 0.009 ± 0.004     |
| <i>Tomopteris sp.</i>                                   | L | 20 mm    | 2.00 | 10  | 2.46  | 0.049 | 0.108   | 0.002 ± 0.001      | 0.850  | 2.332    | 0.036 ± 0.012     |
| <i>Triconia borealis</i>                                | S | -        | 1.50 | 213 | 52.33 | 0.200 | 881.818 | 39.127 ± 4.500     | 0.007  | 29.100   | 1.245 ± 0.142     |
| Amphipods                                               |   |          |      |     |       |       |         | 5.045 ± 0.557      |        |          | 43.507 ± 5.705    |
| Copepods                                                |   |          |      |     |       |       |         | 2808.164 ± 141.035 |        |          | 480.361 ± 18.312  |
| Cladocerans                                             |   |          |      |     |       |       |         | 0.409 ± 0.290      |        |          | 0.011 ± 0.008     |
| Gelatinous (jellyfish. comb jellies. pelagic tunicates) |   |          |      |     |       |       |         | 24.710 ± 5.486     |        |          | 31.082 ± 4.829    |
| Pteropods                                               |   |          |      |     |       |       |         | 142.098 ± 42.796   |        |          | 16.574 ± 2.776    |
| Cumaceans                                               |   |          |      |     |       |       |         | 0.675 ± 0.261      |        |          | 9.756 ± 4.737     |
| Meroplankton (larvae of benthic animals)                |   |          |      |     |       |       |         | 311.017 ± 53.613   |        |          | 9.473 ± 1.128     |
| Mysids                                                  |   |          |      |     |       |       |         | 0.094 ± 0.027      |        |          | 0.722 ± 0.217     |
| Protozoa                                                |   |          |      |     |       |       |         | 24.886 ± 5.049     |        |          | 0.199 ± 0.040     |
| Other groups                                            |   |          |      |     |       |       |         | 0.018 ± 0.005      |        |          | 0.195 ± 0.050     |
| Ostracods                                               |   |          |      |     |       |       |         | 0.845 ± 0.279      |        |          | 0.205 ± 0.034     |
| Chaetognaths                                            |   |          |      |     |       |       |         | 23.240 ± 1.306     |        |          | 243.278 ± 11.630  |
| Euphausiids                                             |   |          |      |     |       |       |         | 40.934 ± 10.347    |        |          | 169.043 ± 30.171  |
| Entire zooplankton                                      |   |          |      |     |       |       |         | 3382.136 ± 157.358 |        |          | 1004.405 ± 38.317 |

All **References** are in the main text of the paper
